# Supplementary material for: A relay ring-closing metathesis/Diels–Alder approach to sugar-derived pluramycin-hybrids
Source: Royal Society of Chemistry journal article supplement (doi:10.1039/d4ob01049c), 2024-01-01

## Supporting Information

### A Relay Ring-Closing Metathesis/Diels-Alder Approach to Sugar-Derived

#### Pluramycin- Hybrids

Ajad Singh and Krishna P. Kaliappan\*

Department of Chemistry, Indian Institute of Technology Bombay

Powai, Mumbai- 400 076

E-mail: [kpk@chem.iitb.ac.in](mailto:kpk@chem.iitb.ac.in)

| S. N | Table of Contents                                                            | Page No. |
|------|------------------------------------------------------------------------------|----------|
| 1.   | Scheme S1: Preparation of known aldehyde <b>15</b> from D-glucose            | S2       |
| 2.   | Scheme S2: Synthesis of diene <b>41</b> from alcohol <b>25</b>               | S2       |
| 3.   | Table 1: Optimization Conditions for Selective Reduction of Ketone <b>S9</b> | S3       |
| 4.   | References                                                                   | S3       |
| 5.   | <sup>1</sup> H, <sup>13</sup> C and 2D NMR Spectral Data                     | S4-S36   |
| 6.   | HRMS data for cycloadduct Intermediates <b>34</b> and <b>44</b>              | S37-S38  |

## 1. Scheme S1: Preparation of known aldehyde **15** from D-glucose:

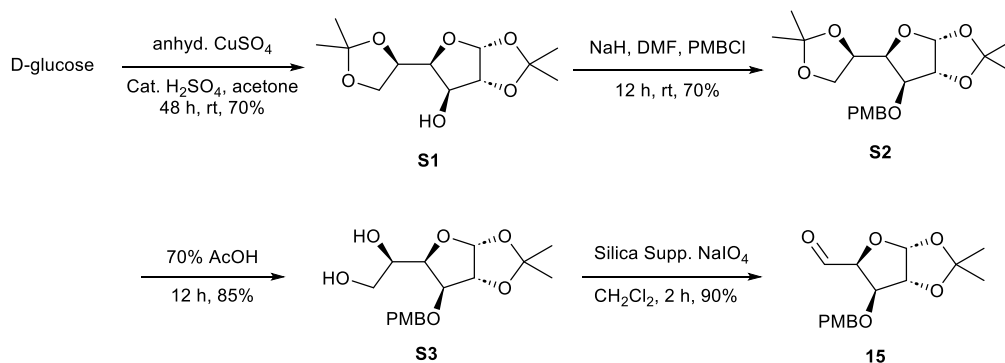

Following the literature procedure,<sup>1</sup> aldehyde **15** was prepared in 4-step sequences from commercially available D-glucose starting material.

## 2. Scheme S2: Synthesis of diene **41** from alcohol **25**:

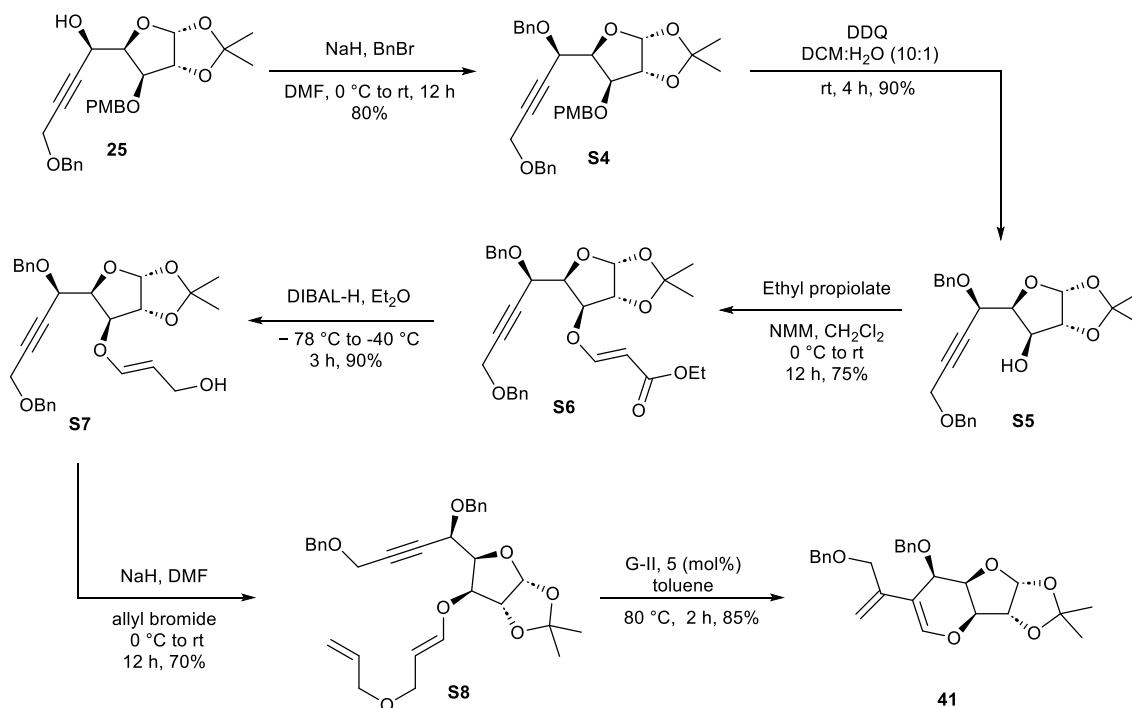

The  $\beta$ -isomer of diene (**41**) was synthesized in an overall 6 steps from the minor isomer of alkyne (**25**) in a similar synthetic procedure as employed for the  $\alpha$ -isomer of **25**.

### 3. Table 1: Optimizing Conditions for Selective Reduction of Ketone **S9**:

The reduction of the crude product of alkynone **S9** was attempted under various conditions with the aim of obtaining a single isomer. It was discovered that all of the selective reduction outcomes occurred through a non-chelated Felkin-Anh transition state. Among the various options, diisobutylaluminium hydride (DIBAL-H), a sterically hindered electrophilic hydride donor, was found to produce predominantly a single isomer, as illustrated in (Table S1, Entry 4).

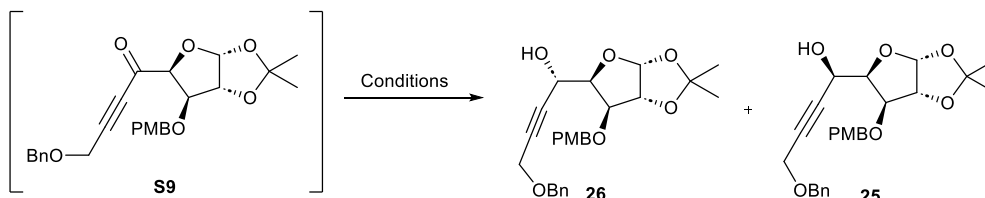

| Entry | Reaction conditions                                    | d.r. <sup>a</sup> | Yield <sup>b</sup> of <b>26</b> |
|-------|--------------------------------------------------------|-------------------|---------------------------------|
| 1.    | LAH, THF, 0 °C to RT, 4 h                              | 1.2:1             | 50%                             |
| 2.    | LAH, THF, -78 °C to RT, 6 h                            | 3:1               | 60%                             |
| 3.    | LAH, CeCl <sub>3</sub> , MeOH, THF, -78 °C to RT, 12 h | 4:1               | 72%                             |
| 4.    | DIBAL-H, Et <sub>2</sub> O, -78 °C to RT, 8 h          | 20:1              | 85%                             |

<sup>a</sup>ratio were calculated with a crude mixture of <sup>1</sup>HNMR analysis. <sup>b</sup>Isolated yield of major isomer **26**

#### Experimental procedure:

An oven-dried, two-neck round bottom flask was evacuated under vacuum and charged with a solution of ketone **S9** (100 mg, 0.22 mmol, 1.0 eq) in dry Et<sub>2</sub>O (10 mL) under N<sub>2</sub> atmosphere. The reaction temperature was brought to -78 °C, and 1 M solution of DIBAL-H in toluene (0.33 mmol, 1.5 eq) was added slowly at the same temperature. The reaction mixture was stirred for 8 h. The reaction mixture was then extracted twice with ethyl acetate (2×10 mL). The combined organic layers were dried over Na<sub>2</sub>SO<sub>4</sub> and concentrated in *vacuo*. The crude product was purified by column chromatography using silica gel (100-200 mesh) chromatography using hexane-ethyl acetate (4:1) as the solvent system to afford the corresponding alcohol **26** (86 mg, 85%) as a colourless liquid.

#### 4. Reference:

- 1) S. Ghosh, M. F. Hossain, C. K. Malik, S. Maity, *Tetrahedron*, 2010, **66**, 9159.

## 5. $^1\text{H}$ , $^{13}\text{C}$ and 2D NMR Spectral Data

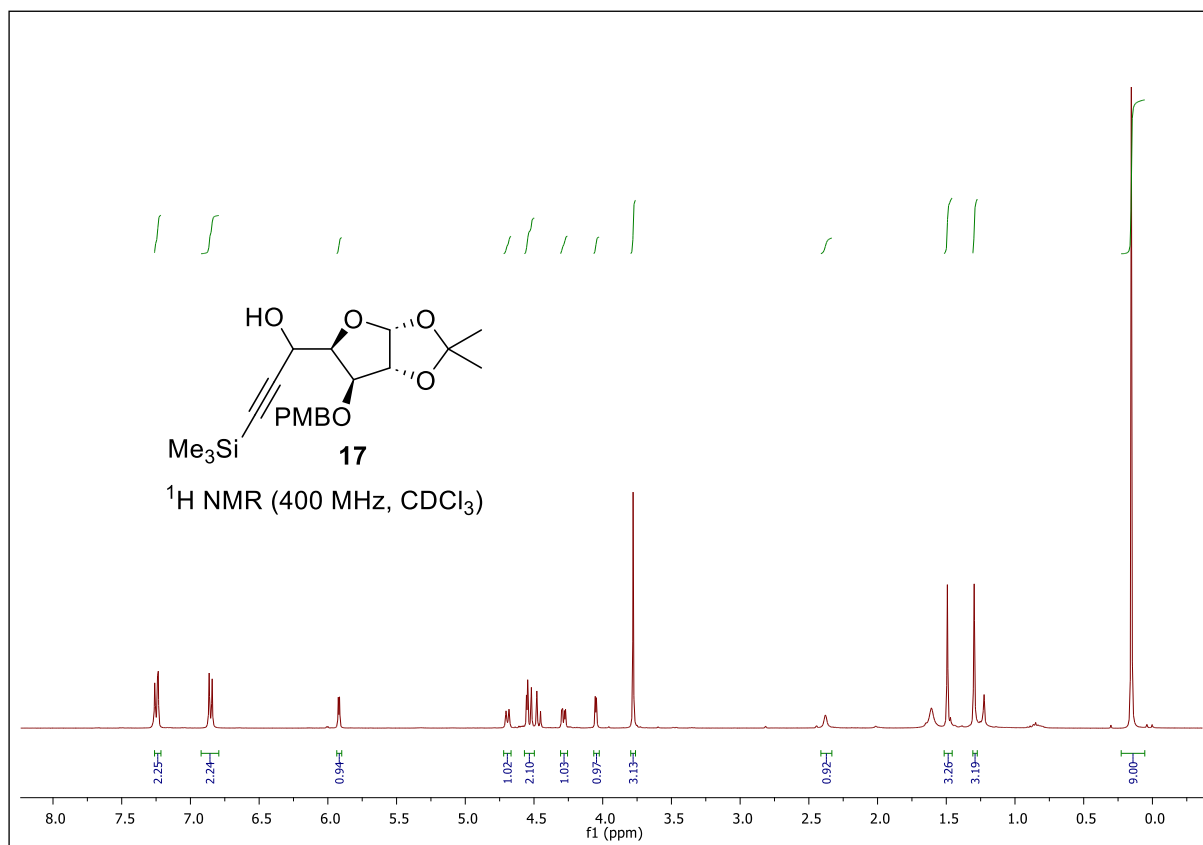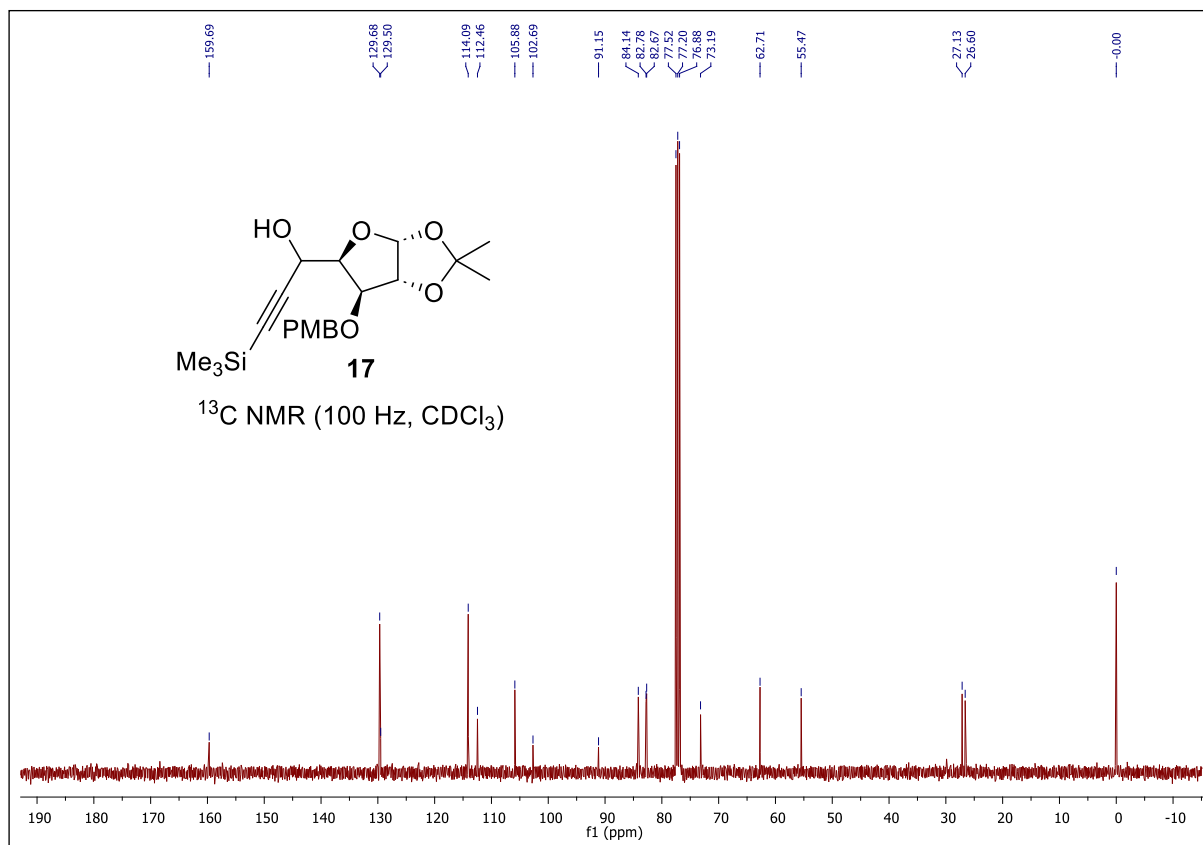

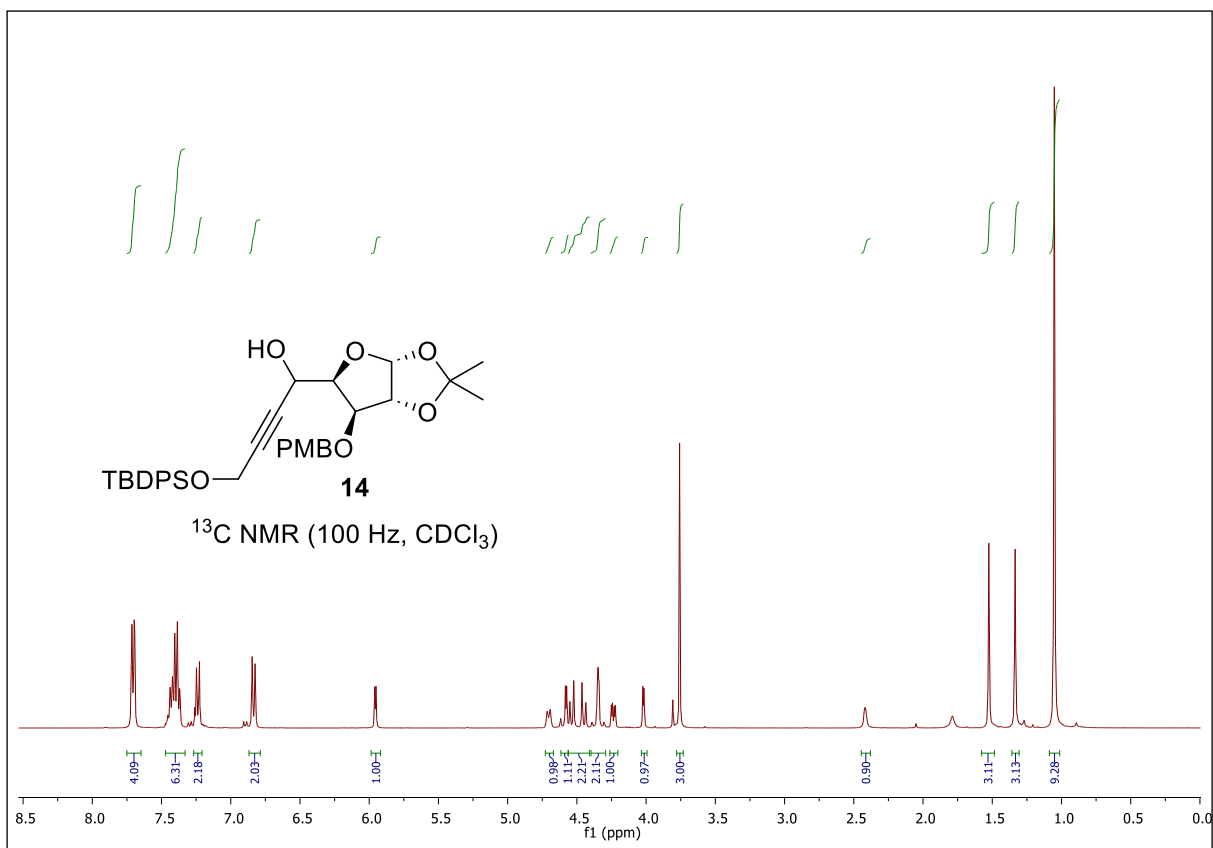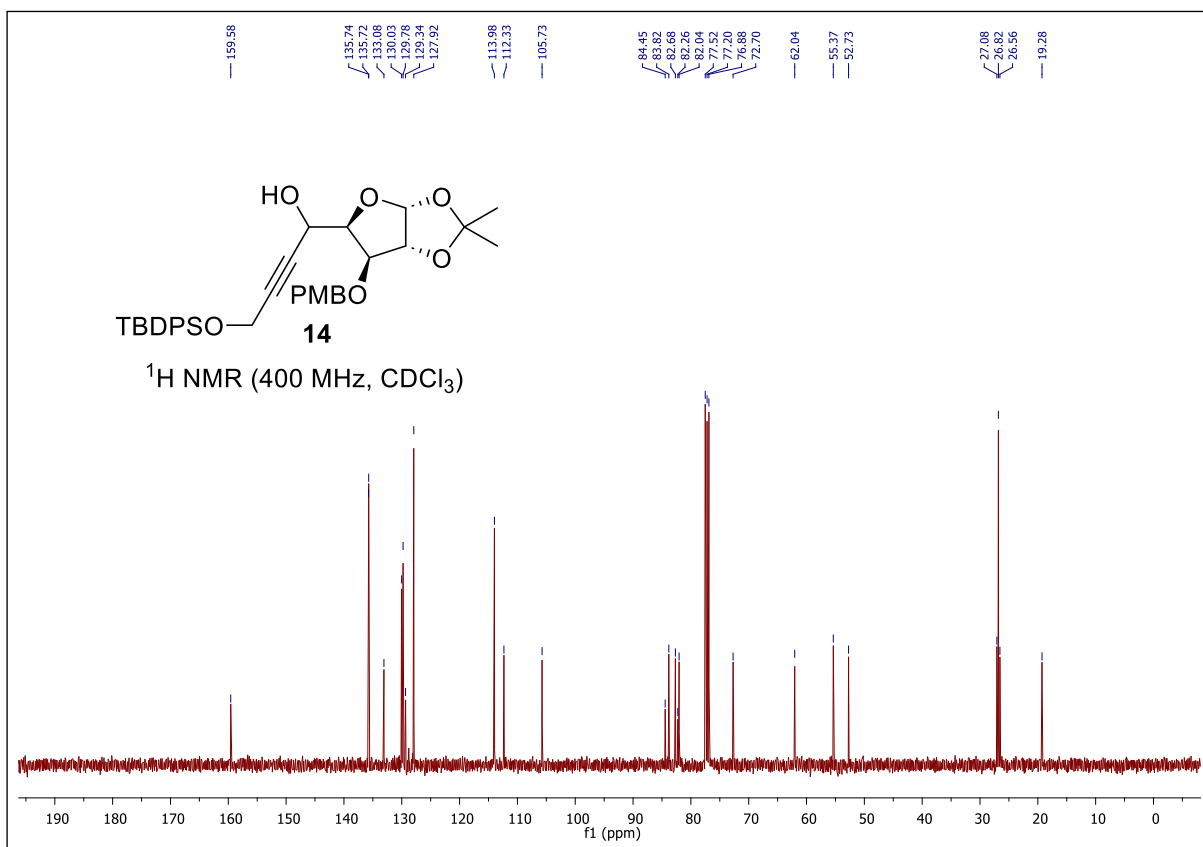

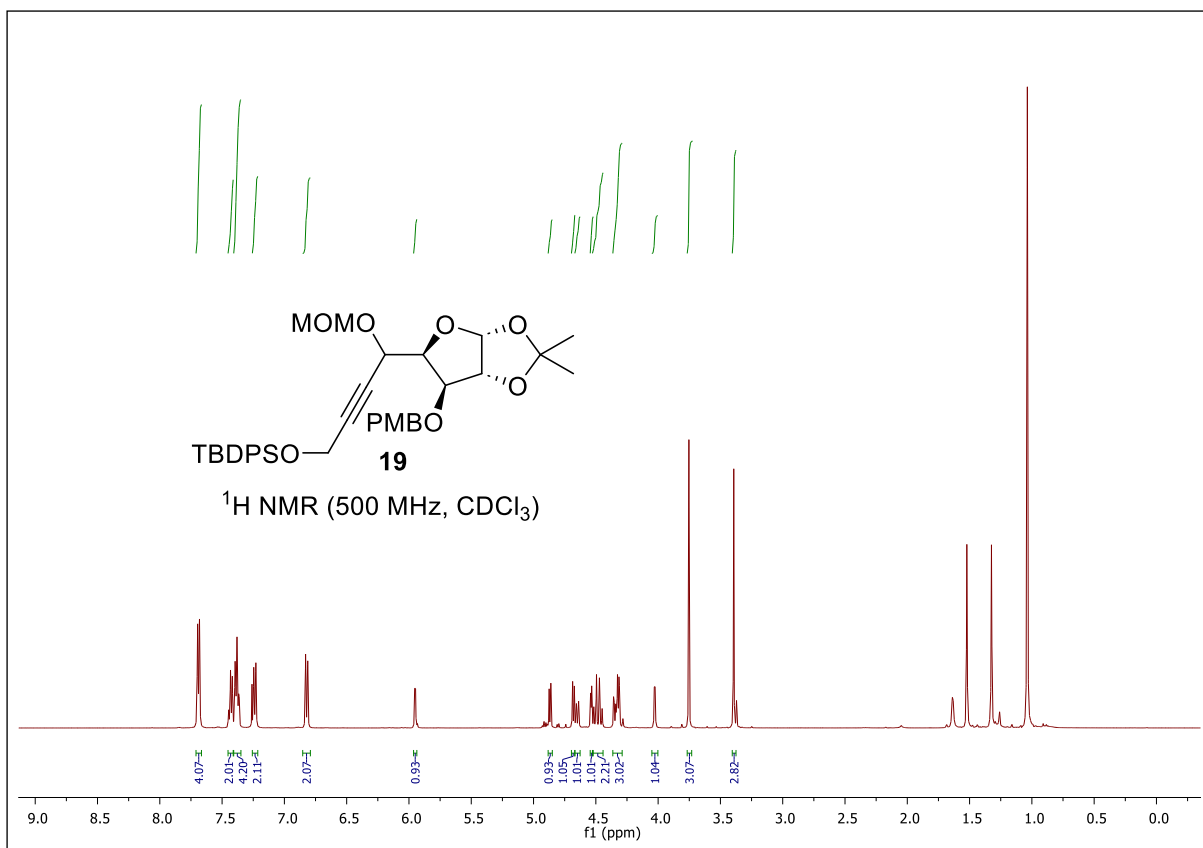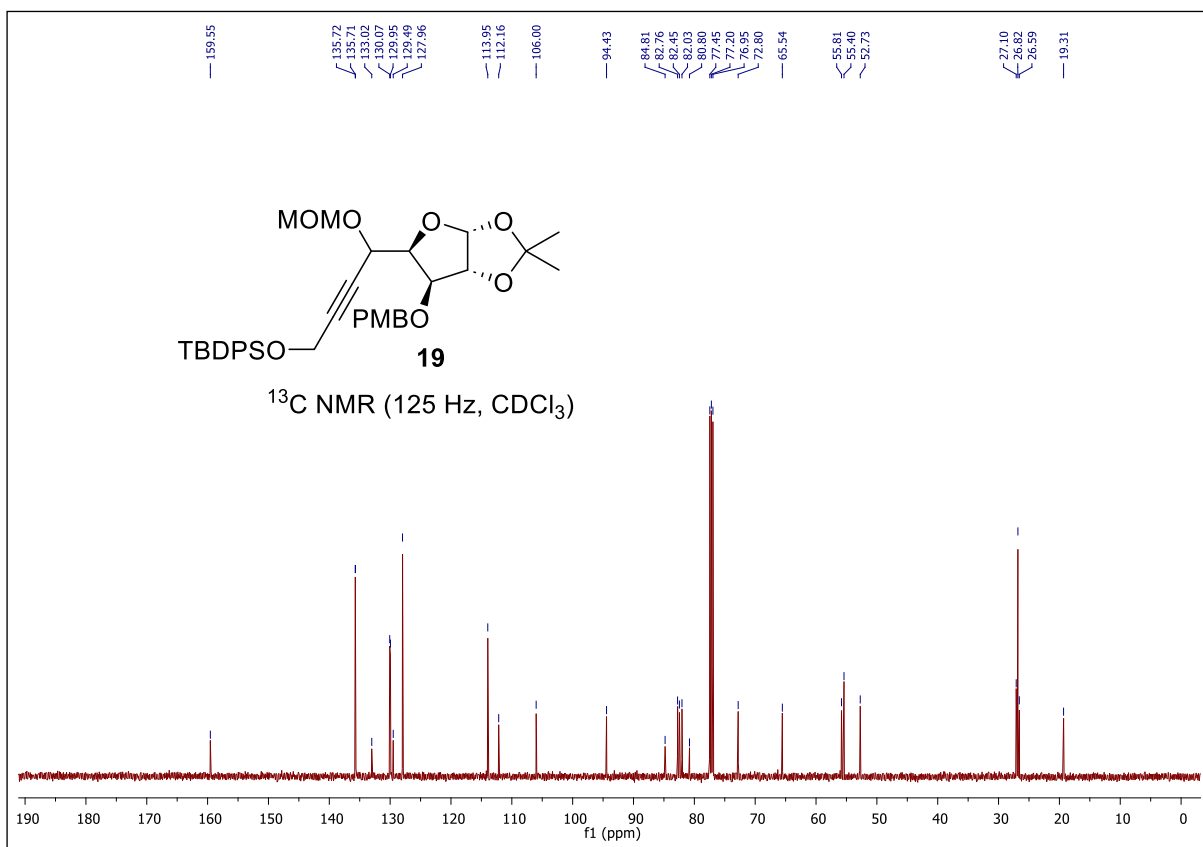

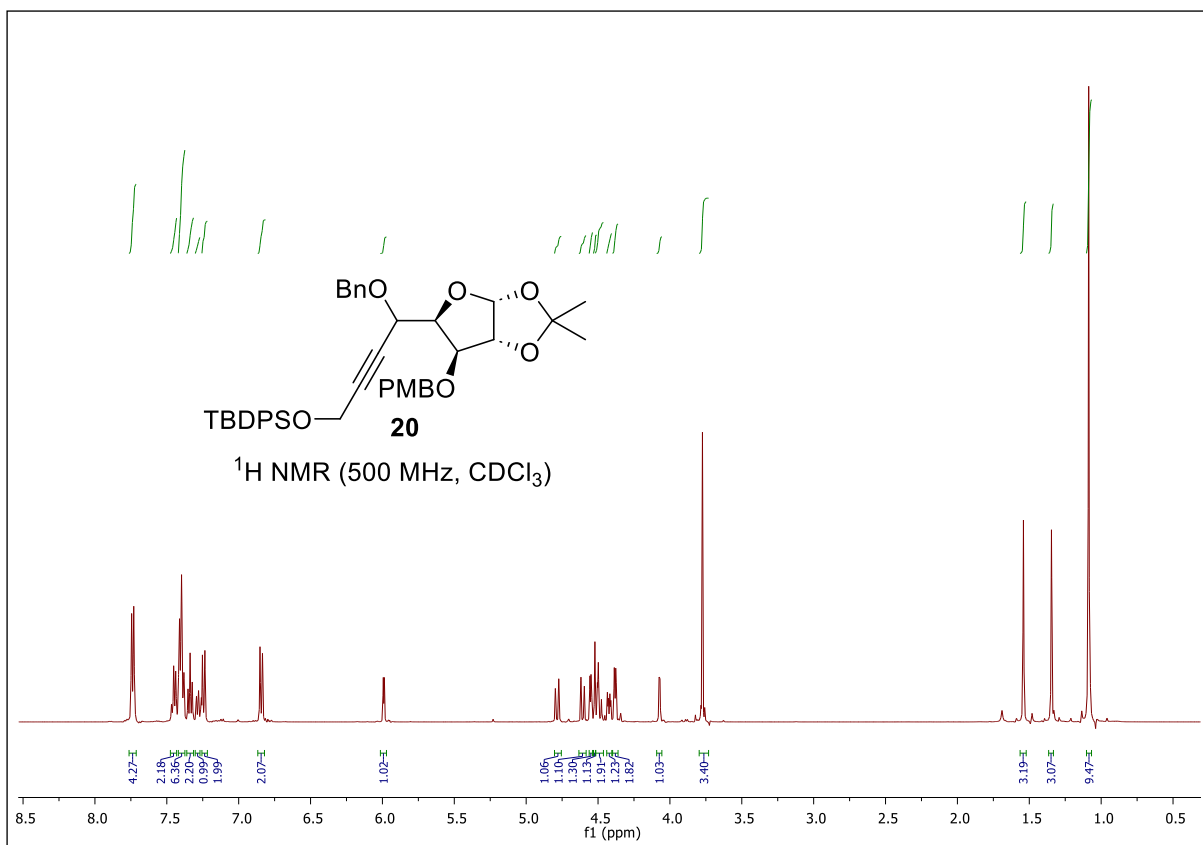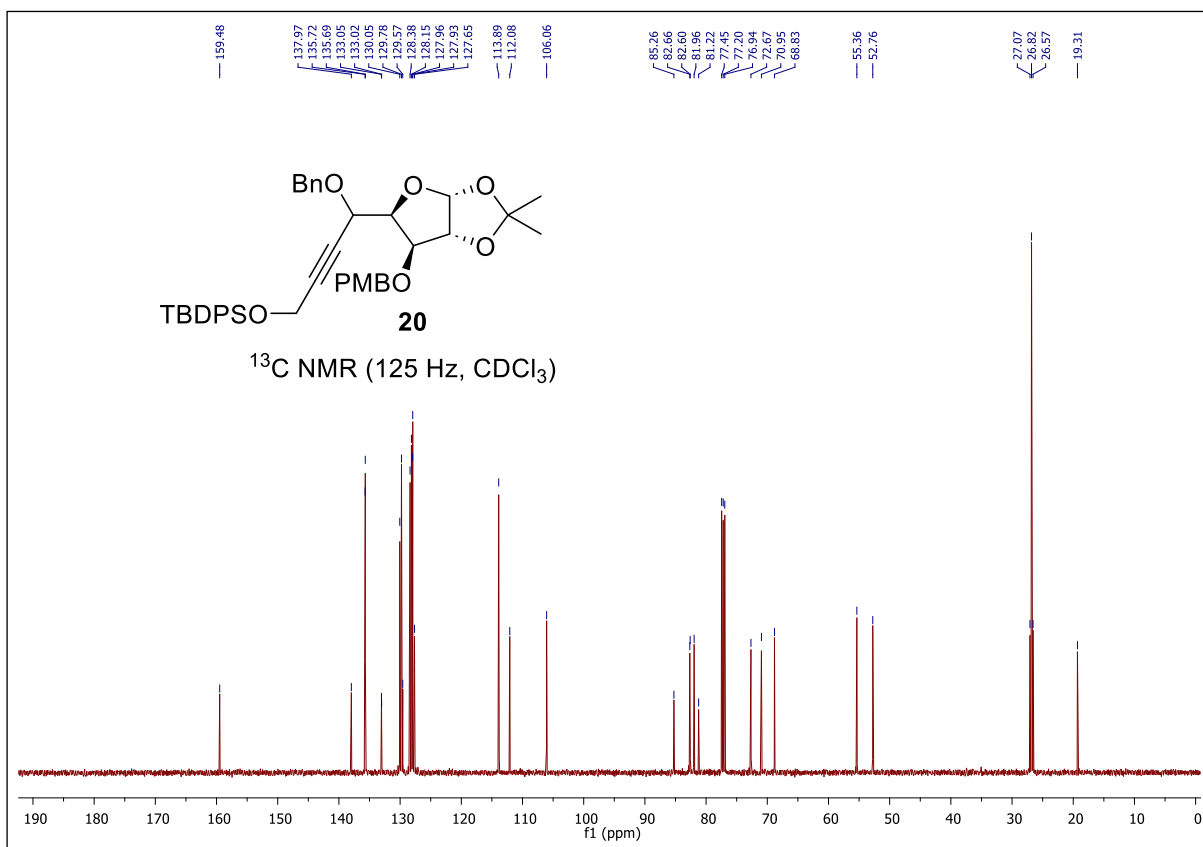

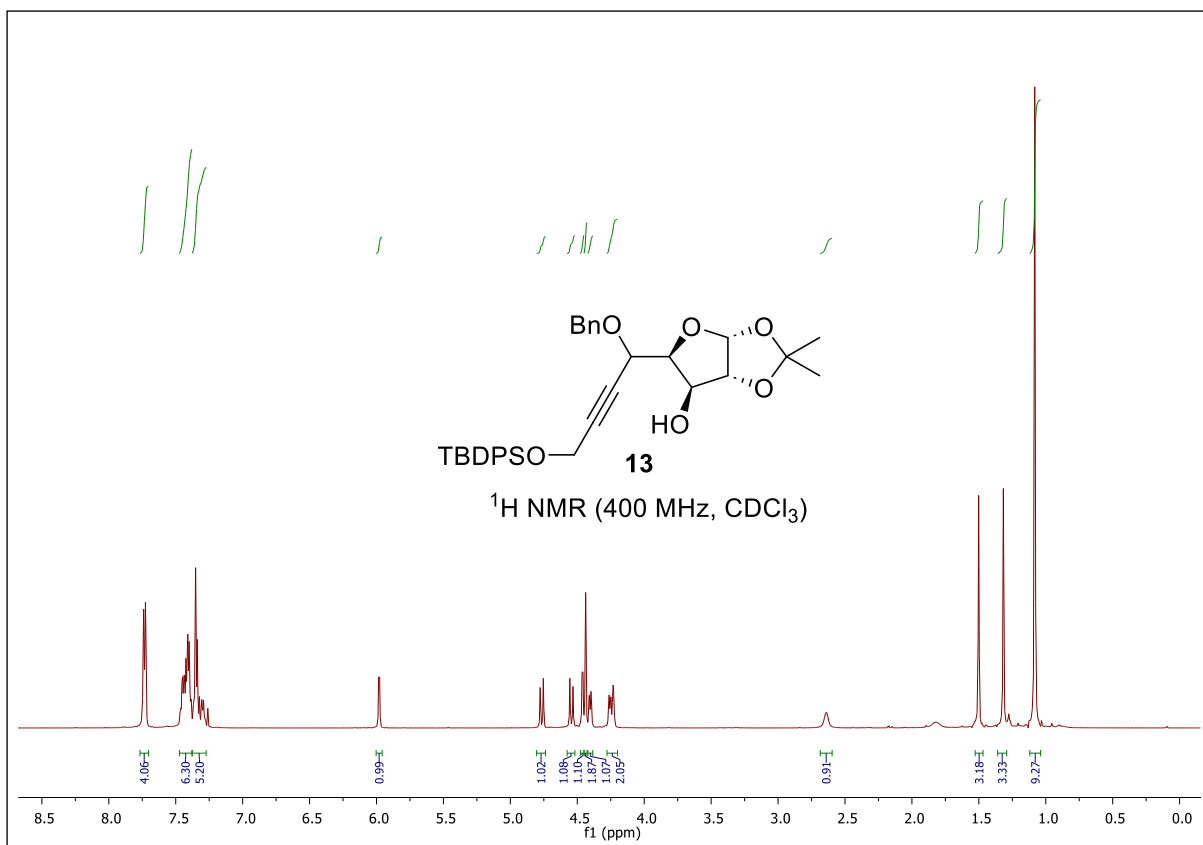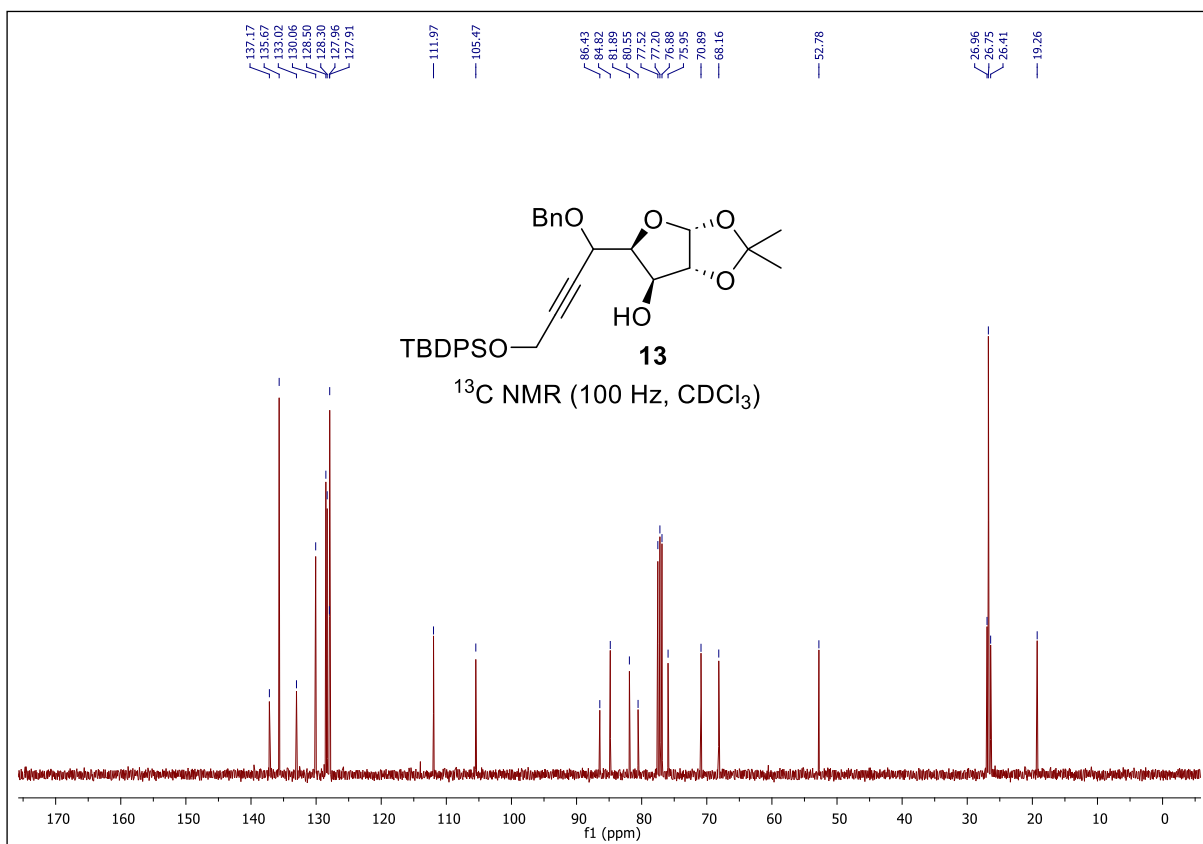



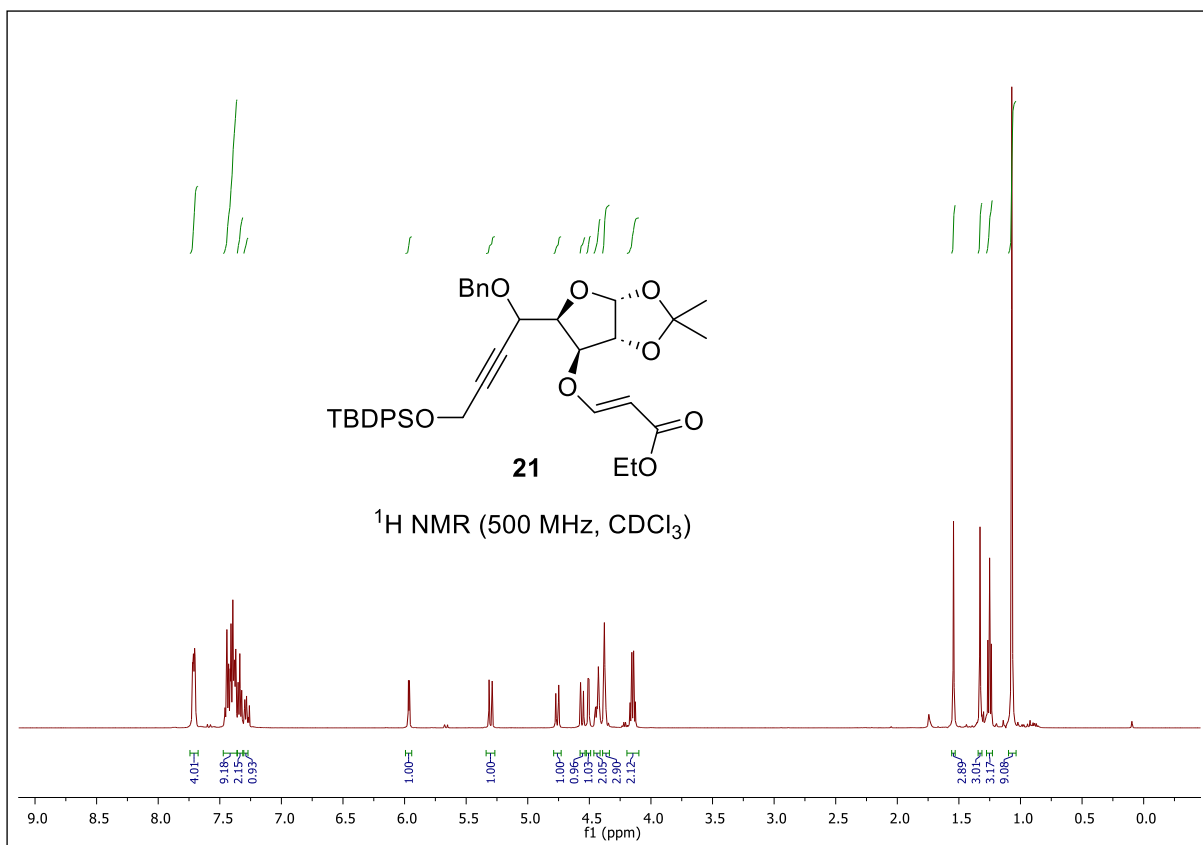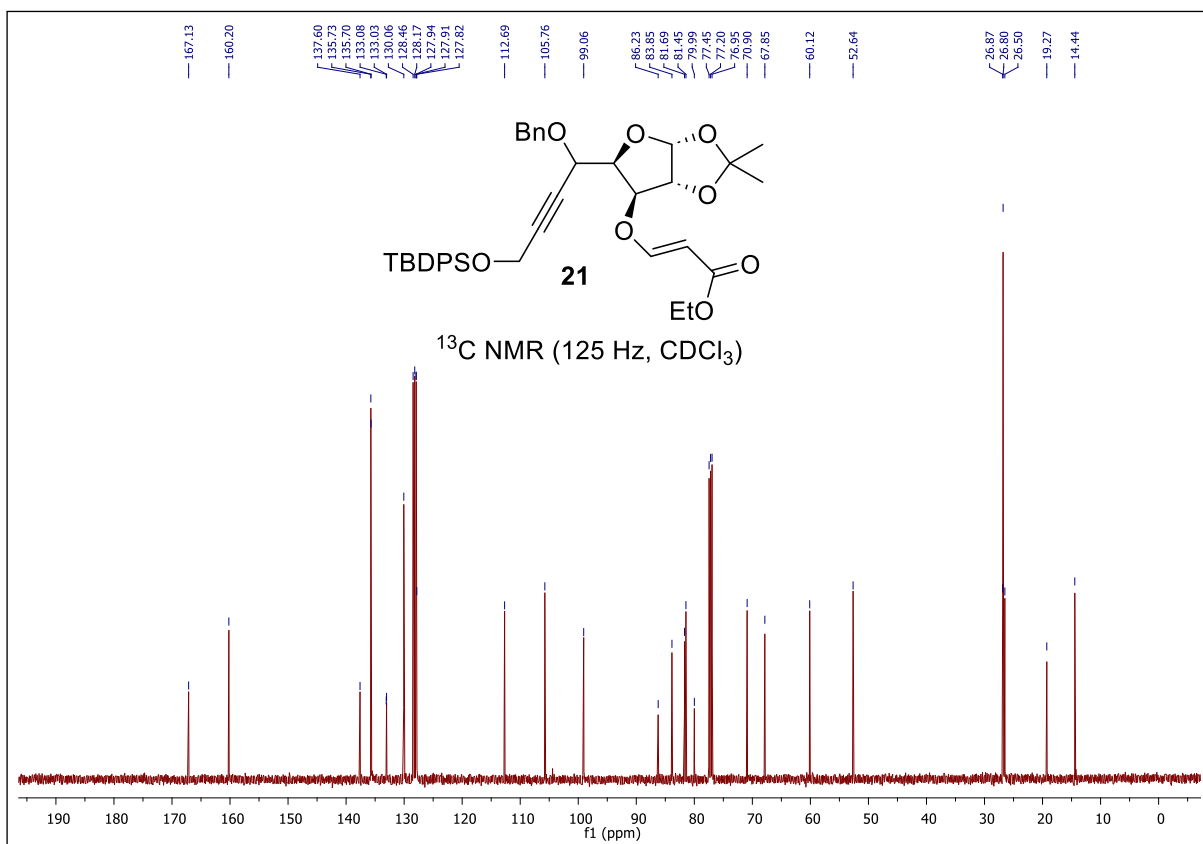

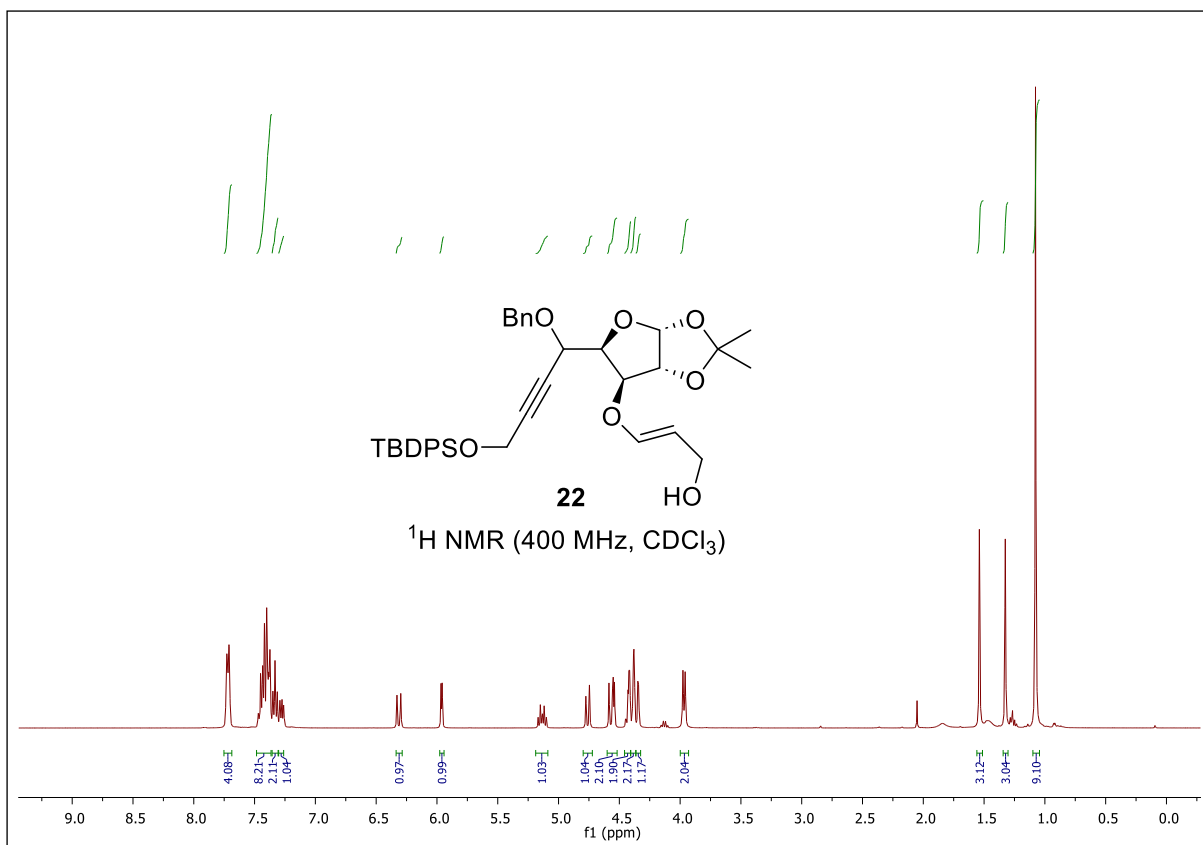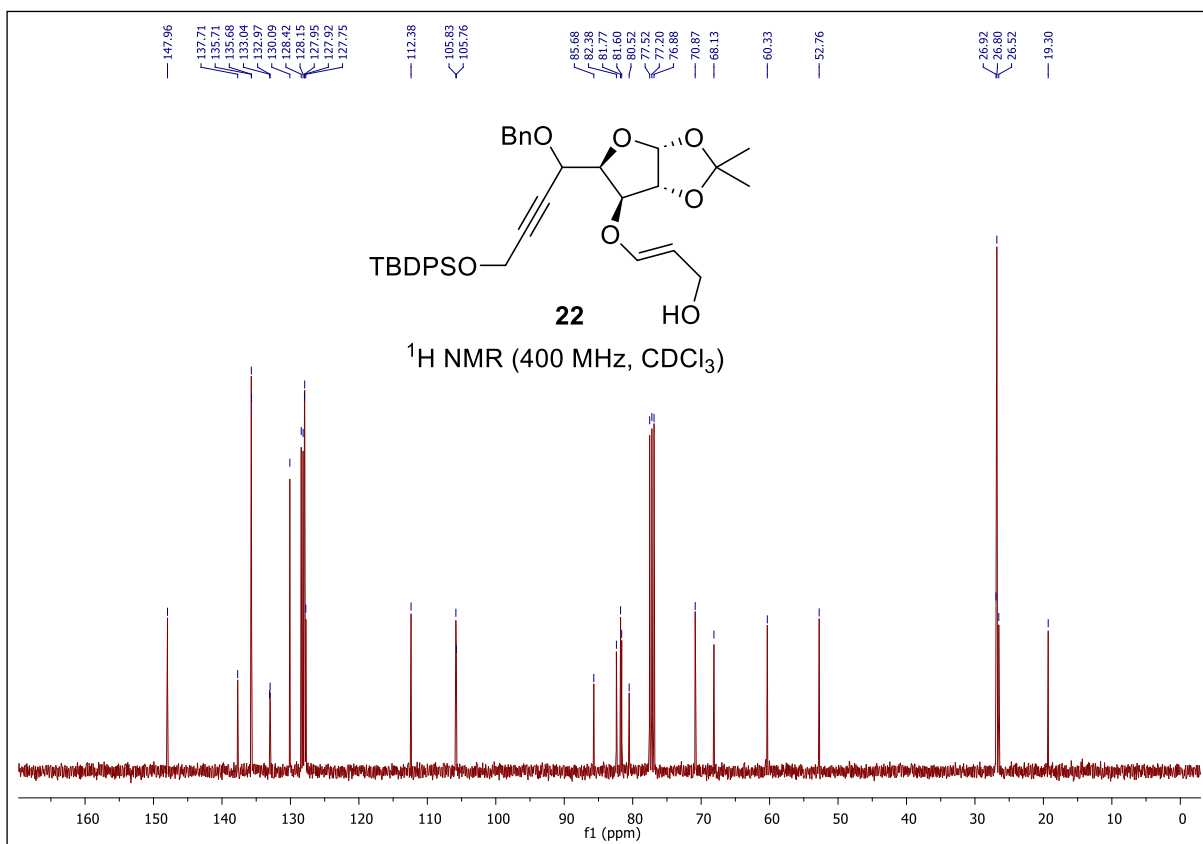

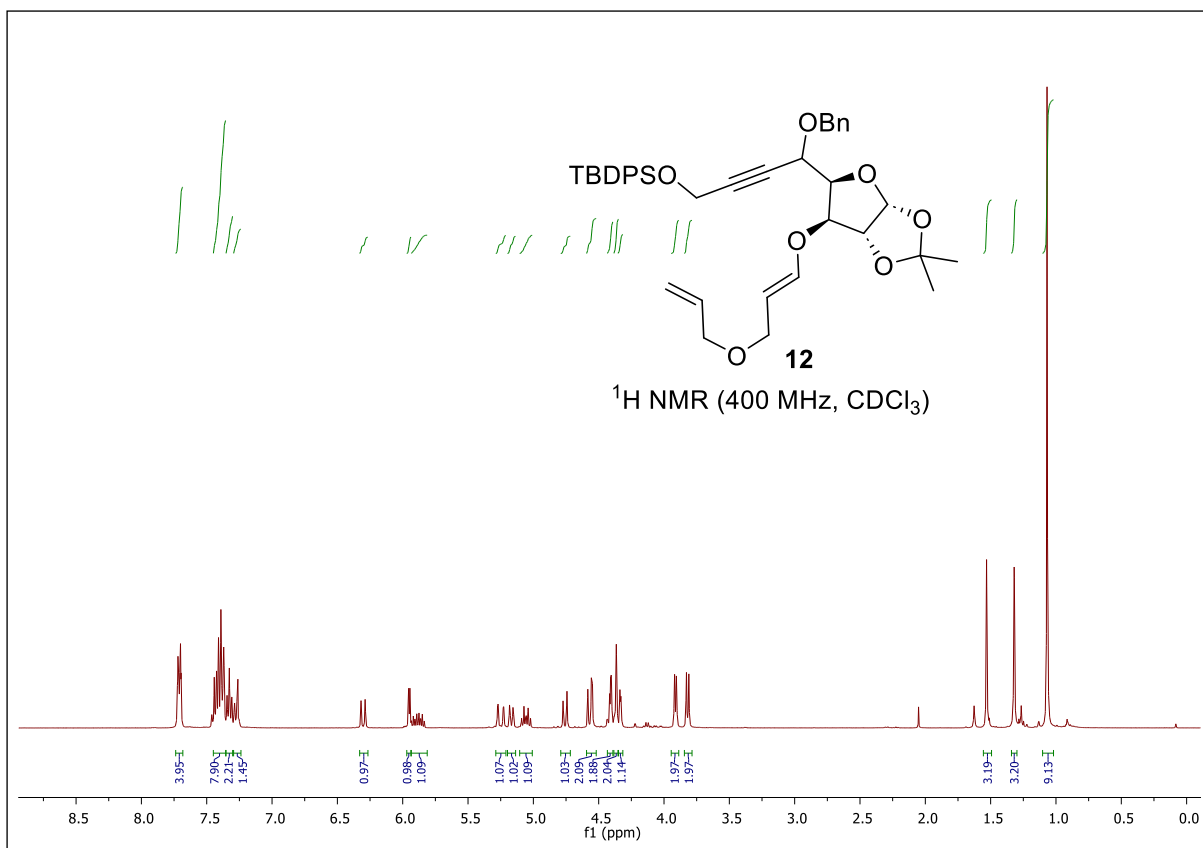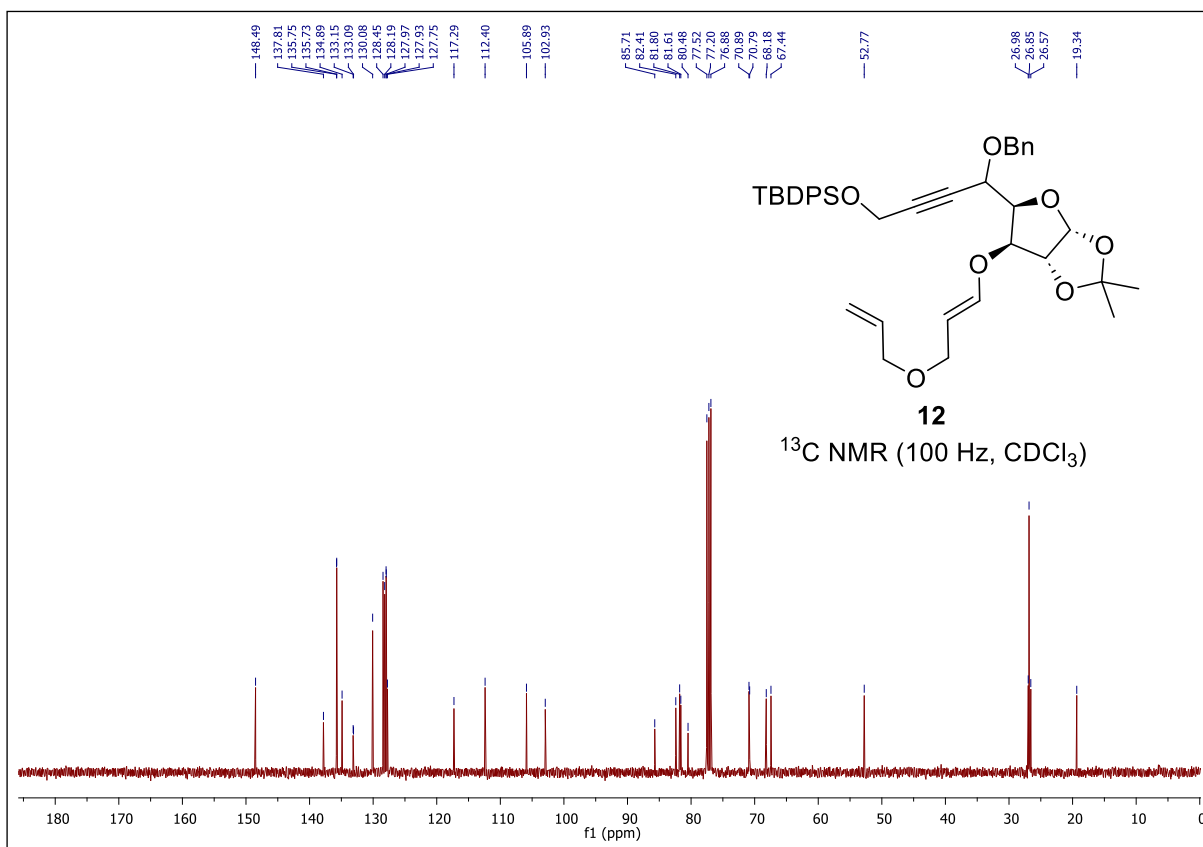

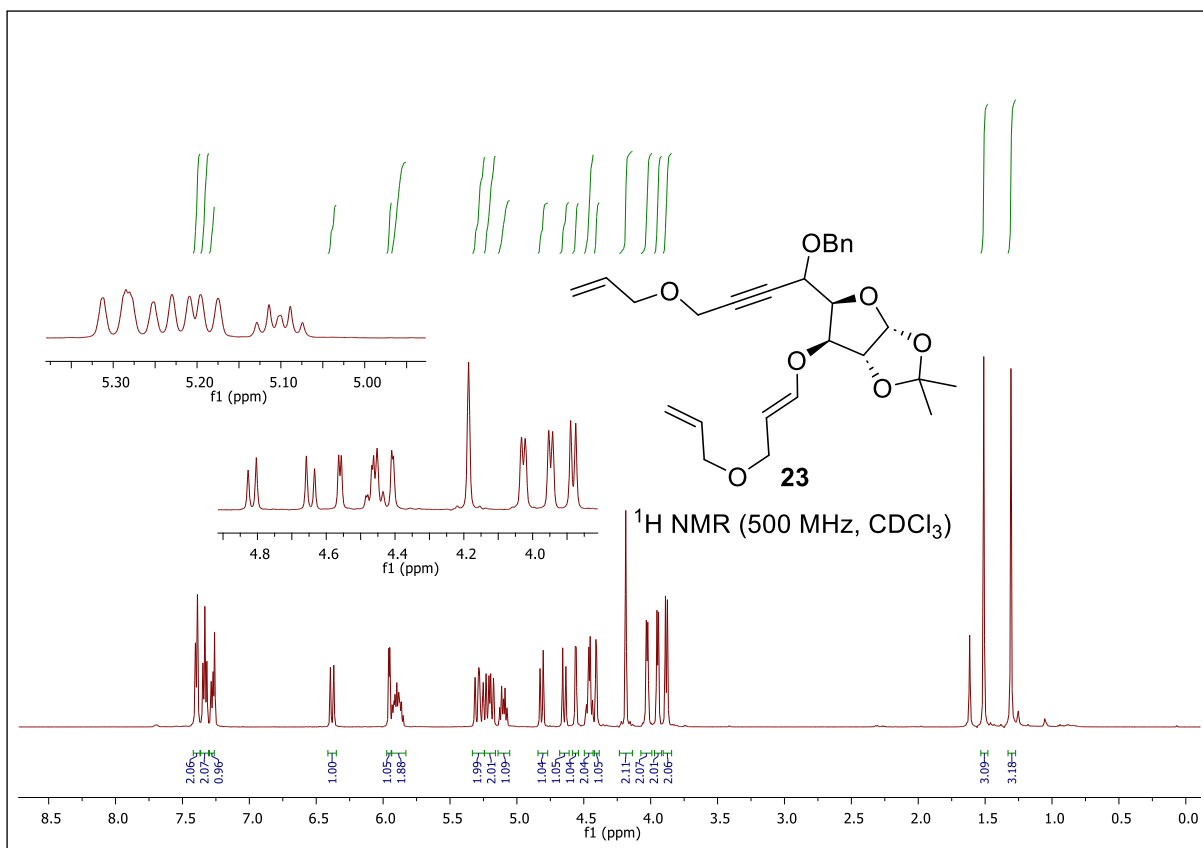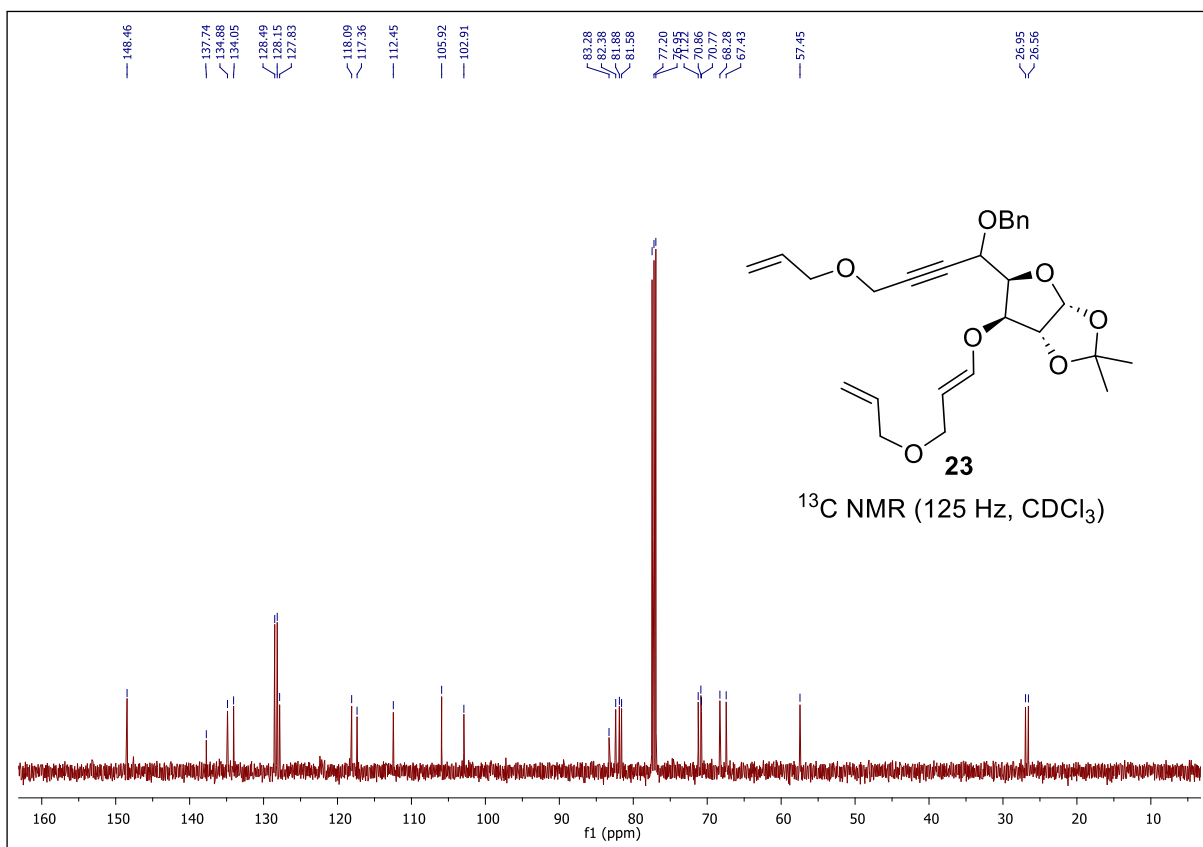

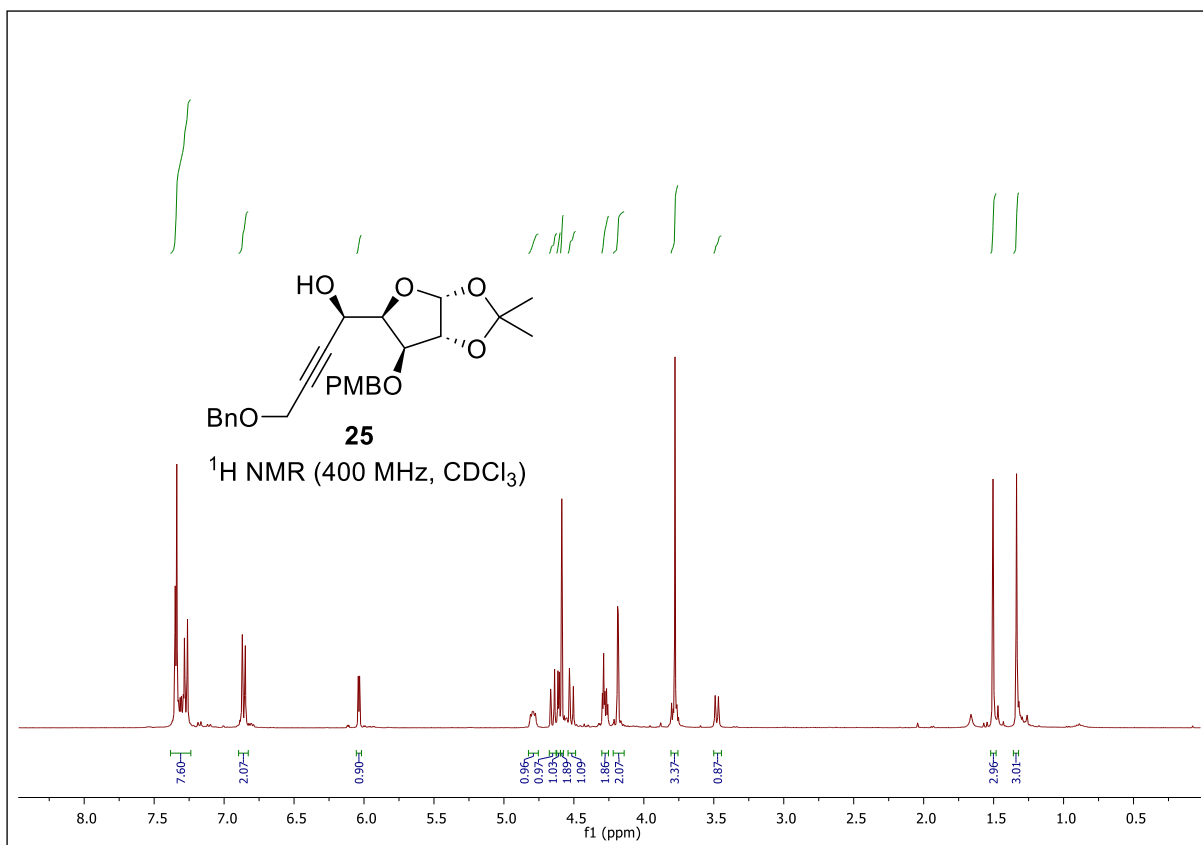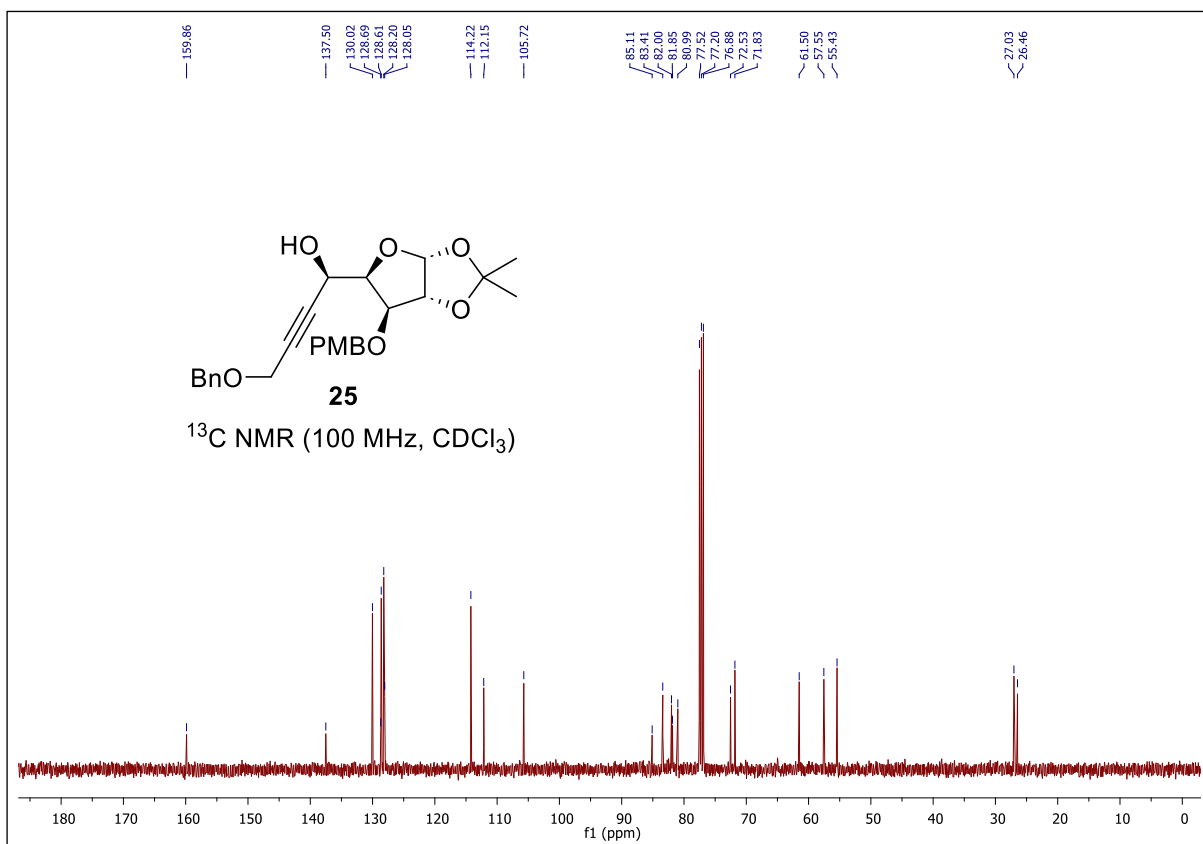

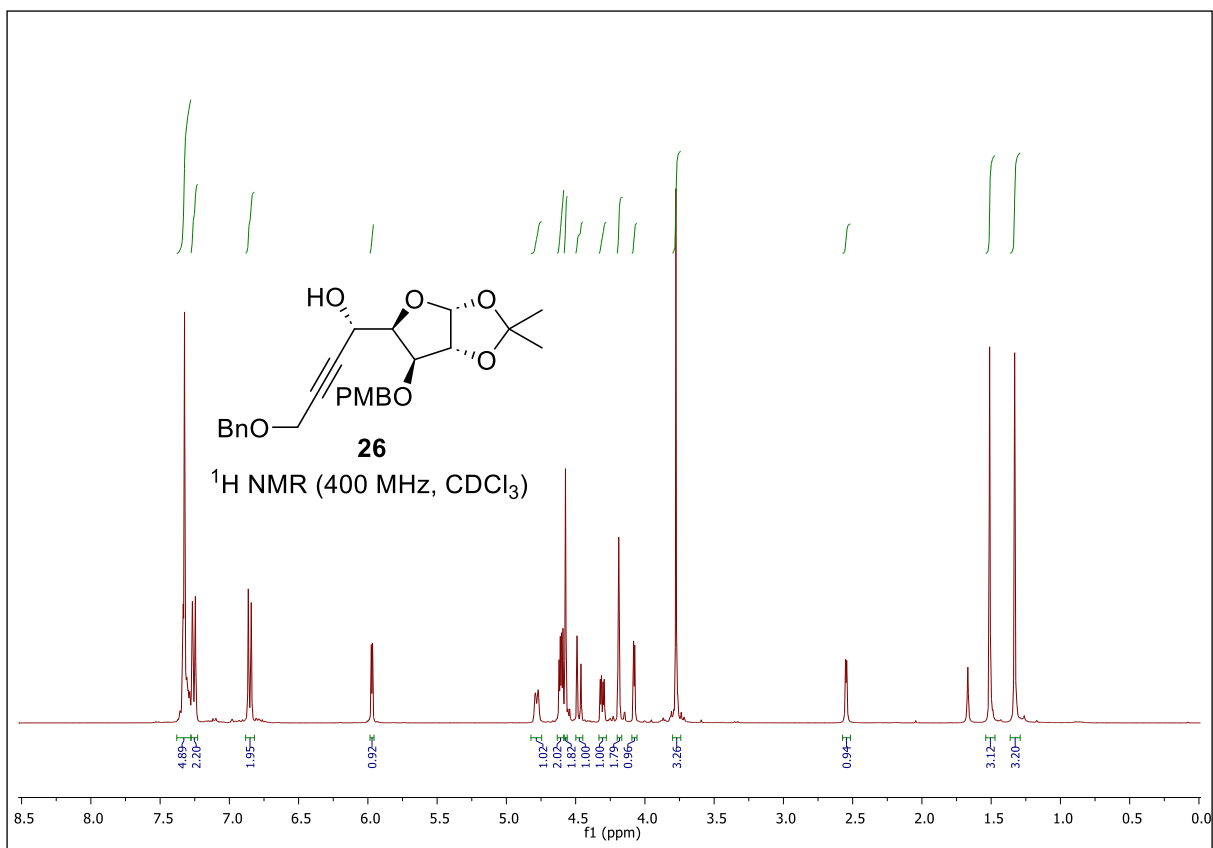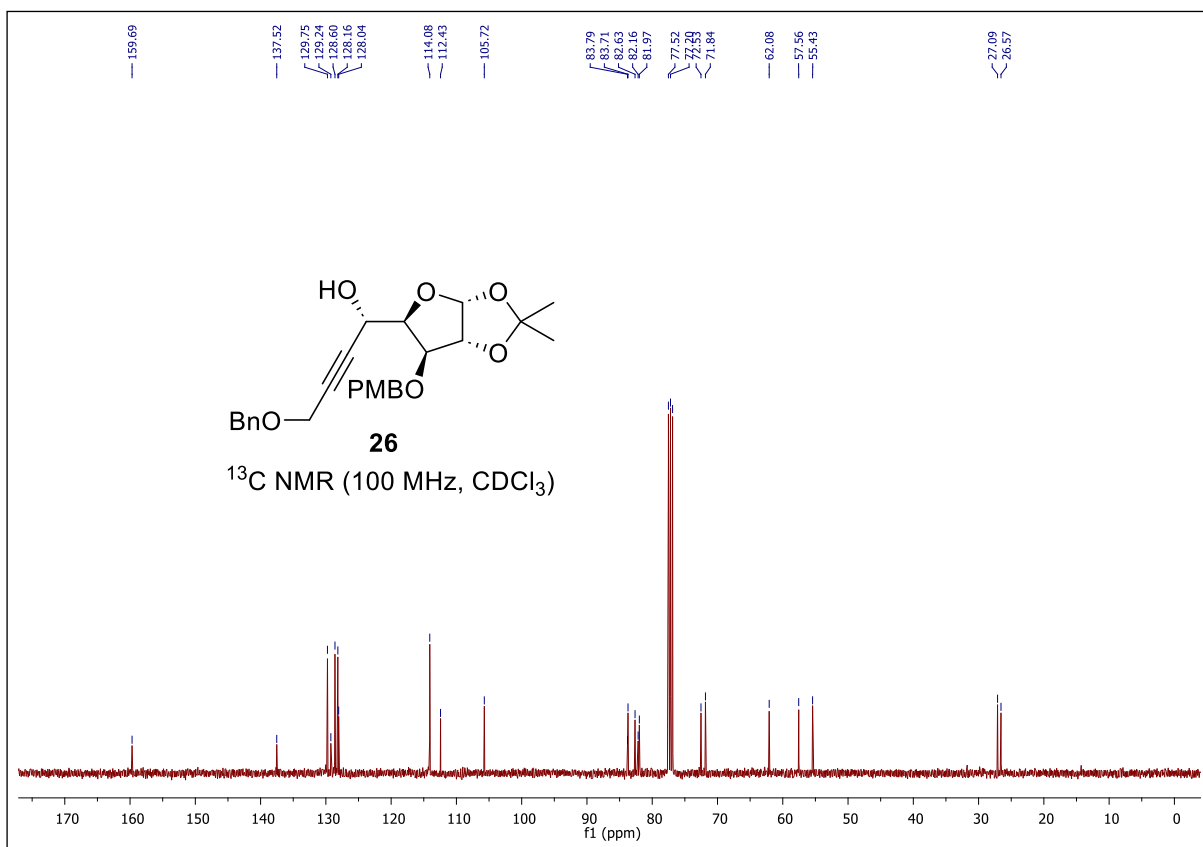

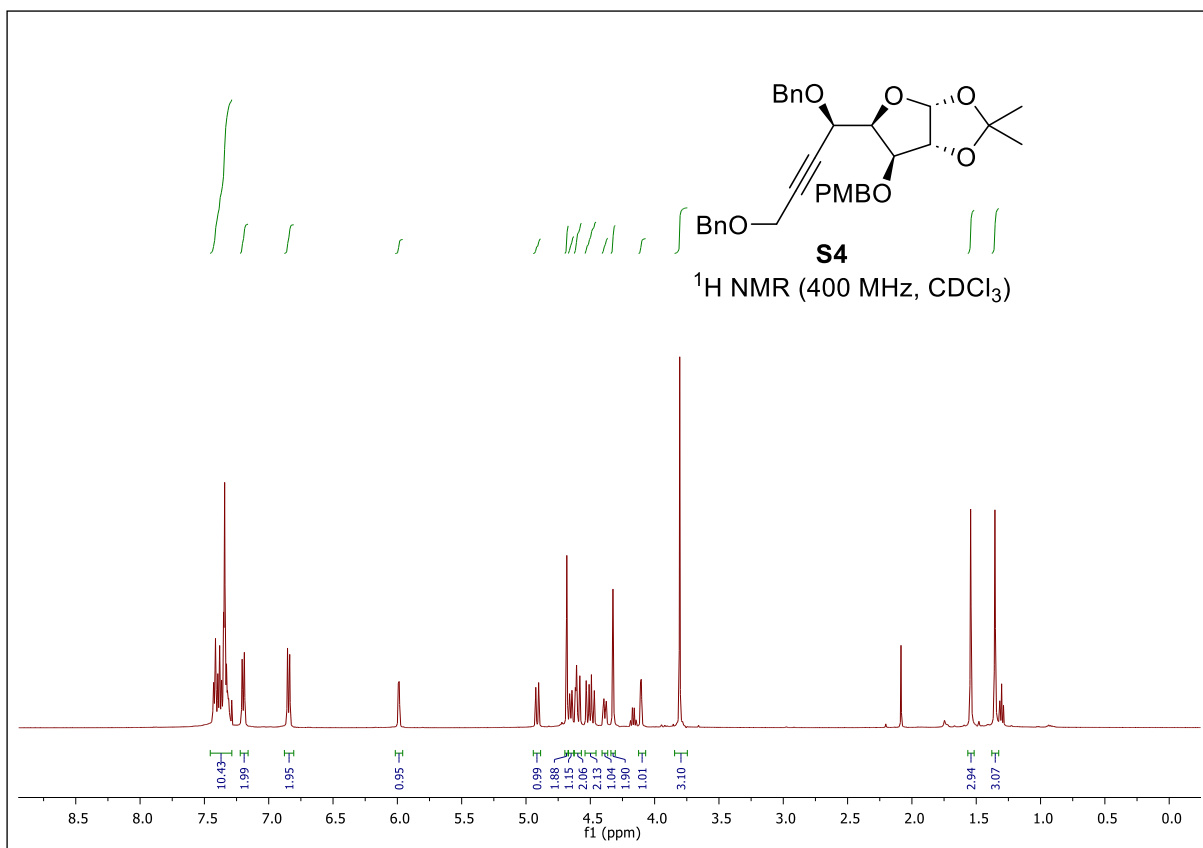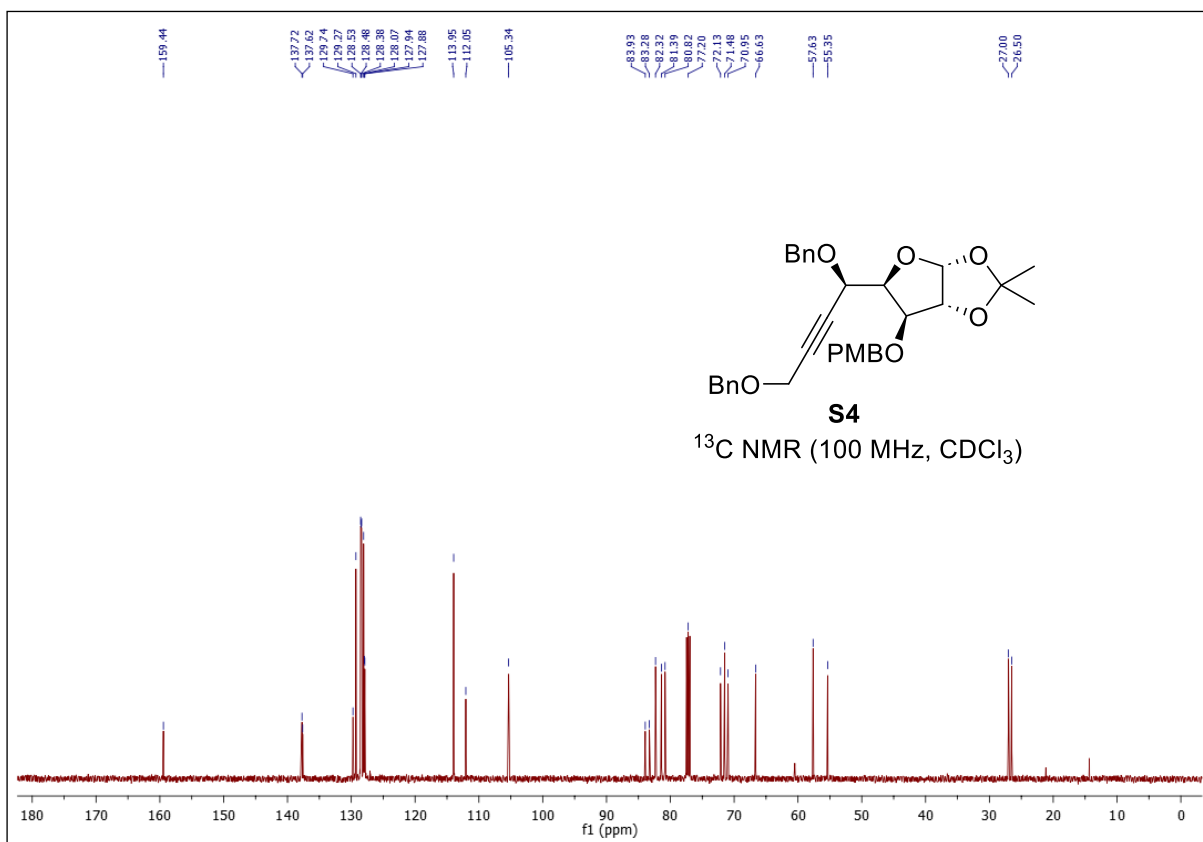

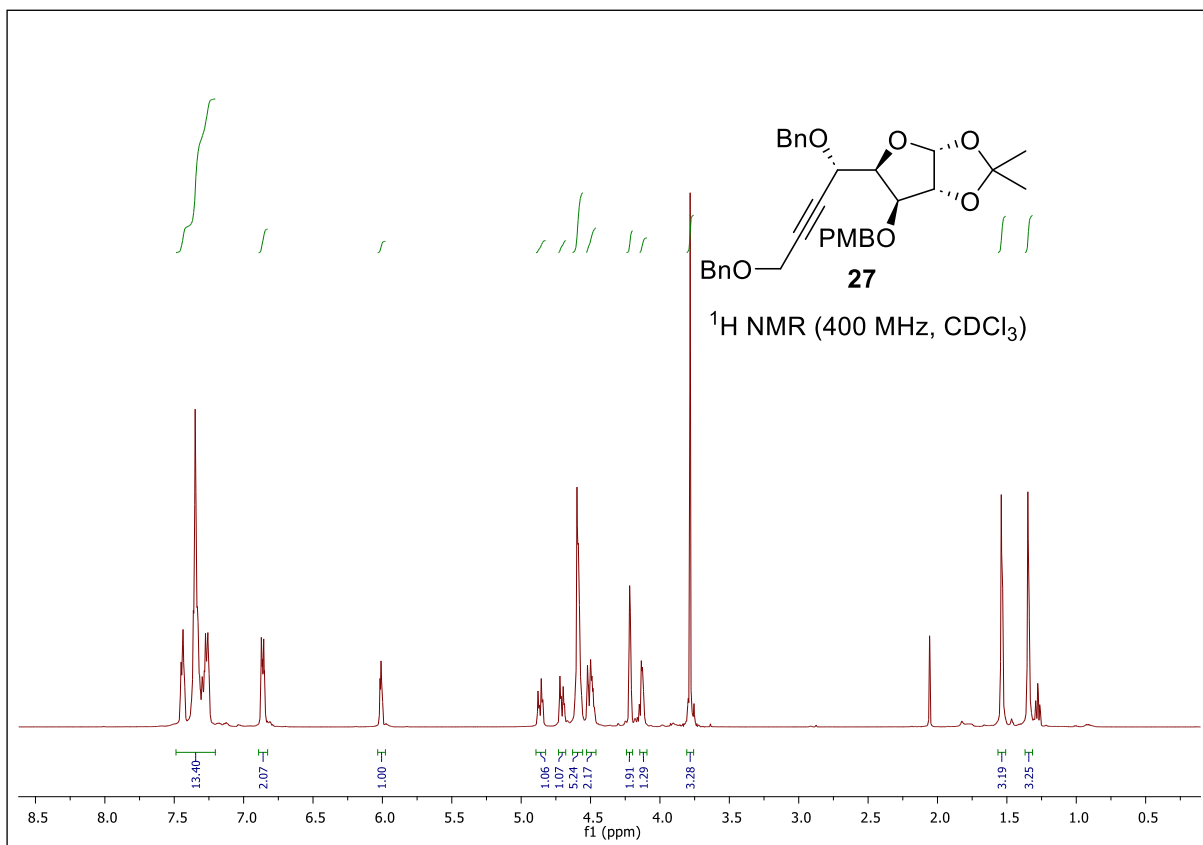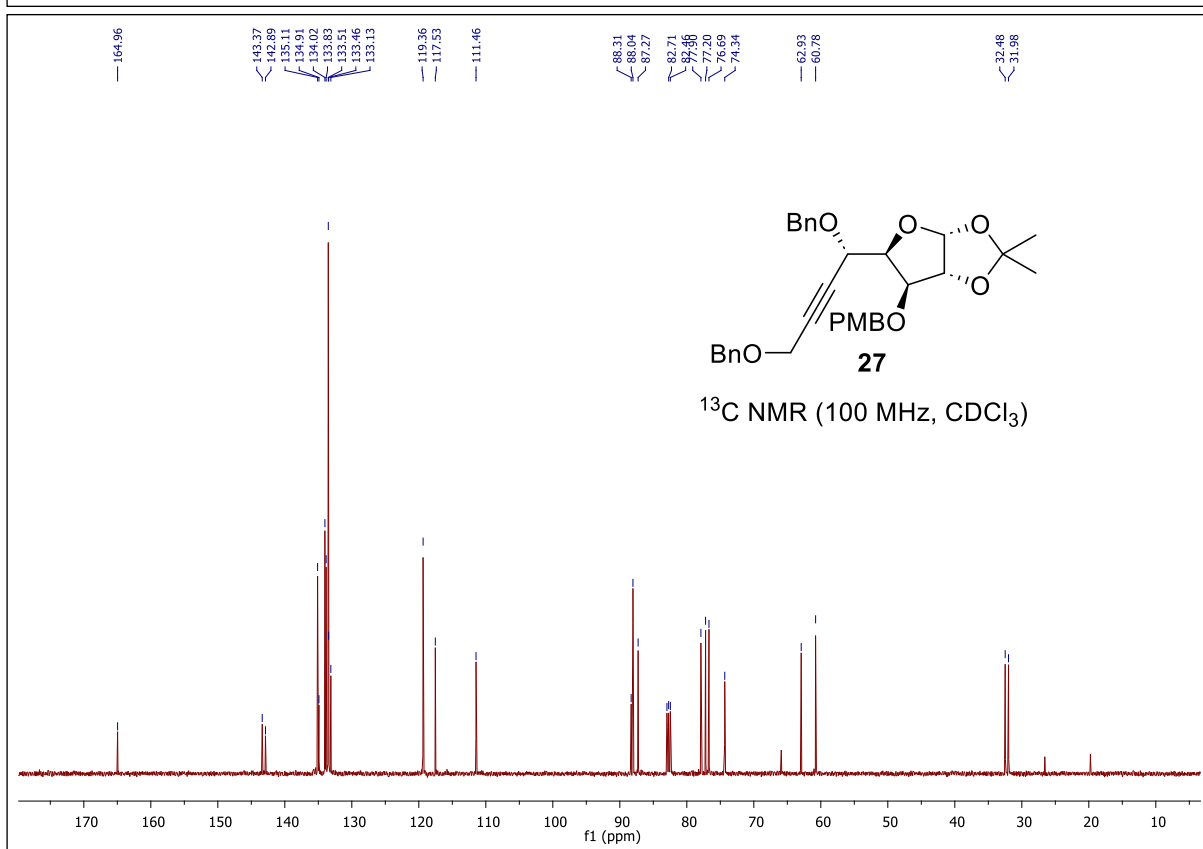



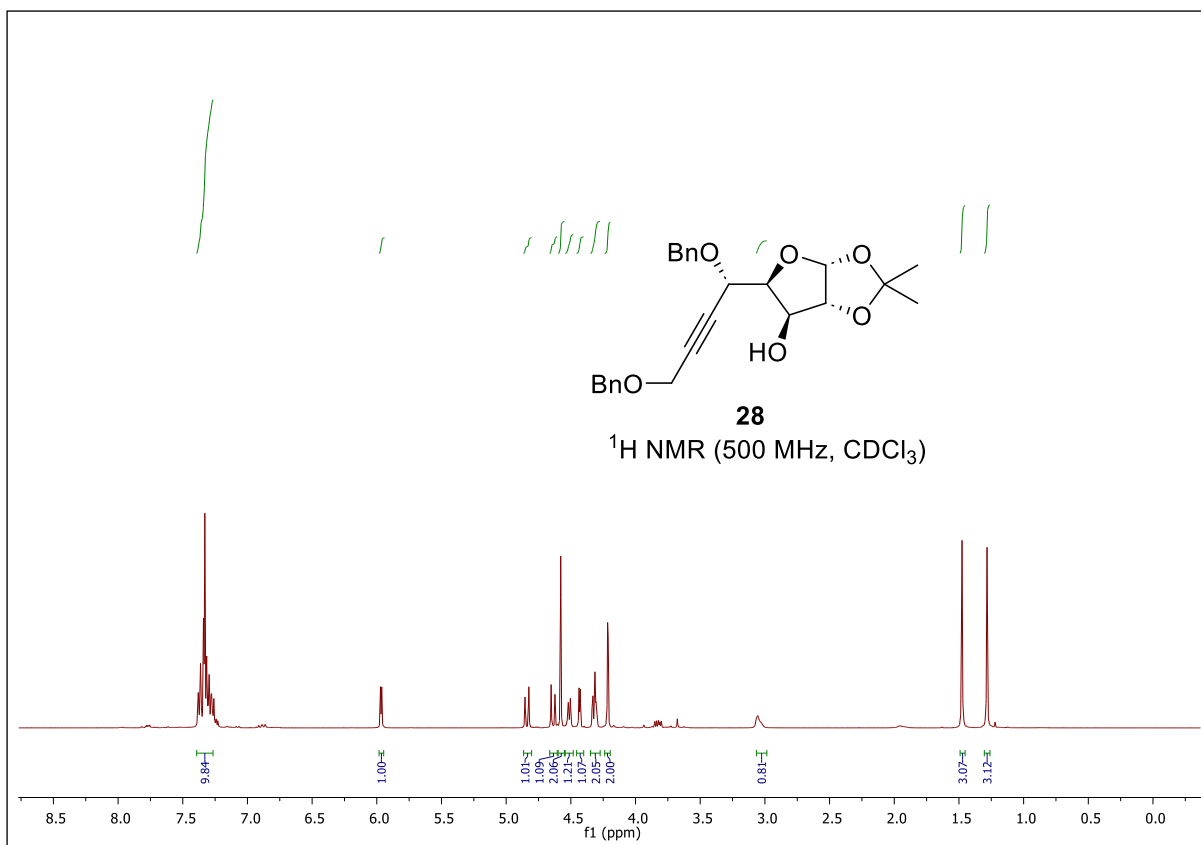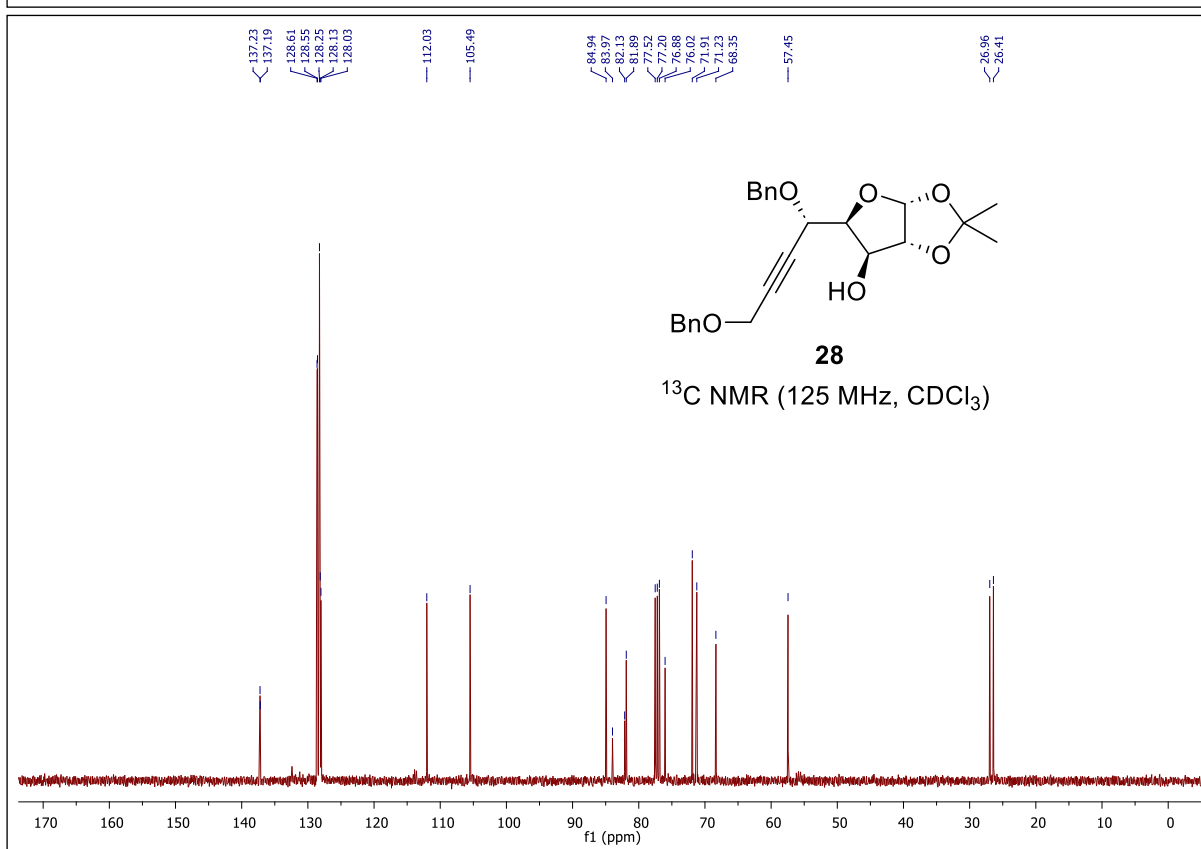

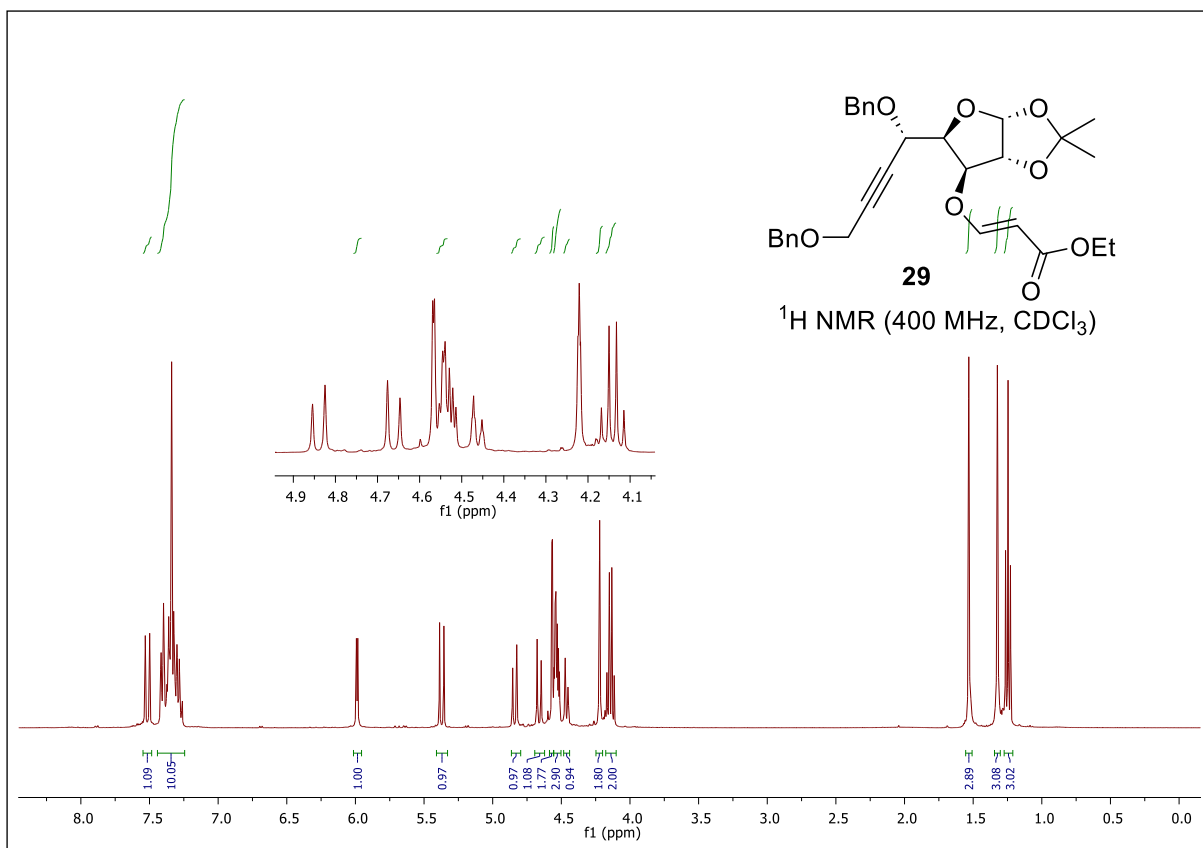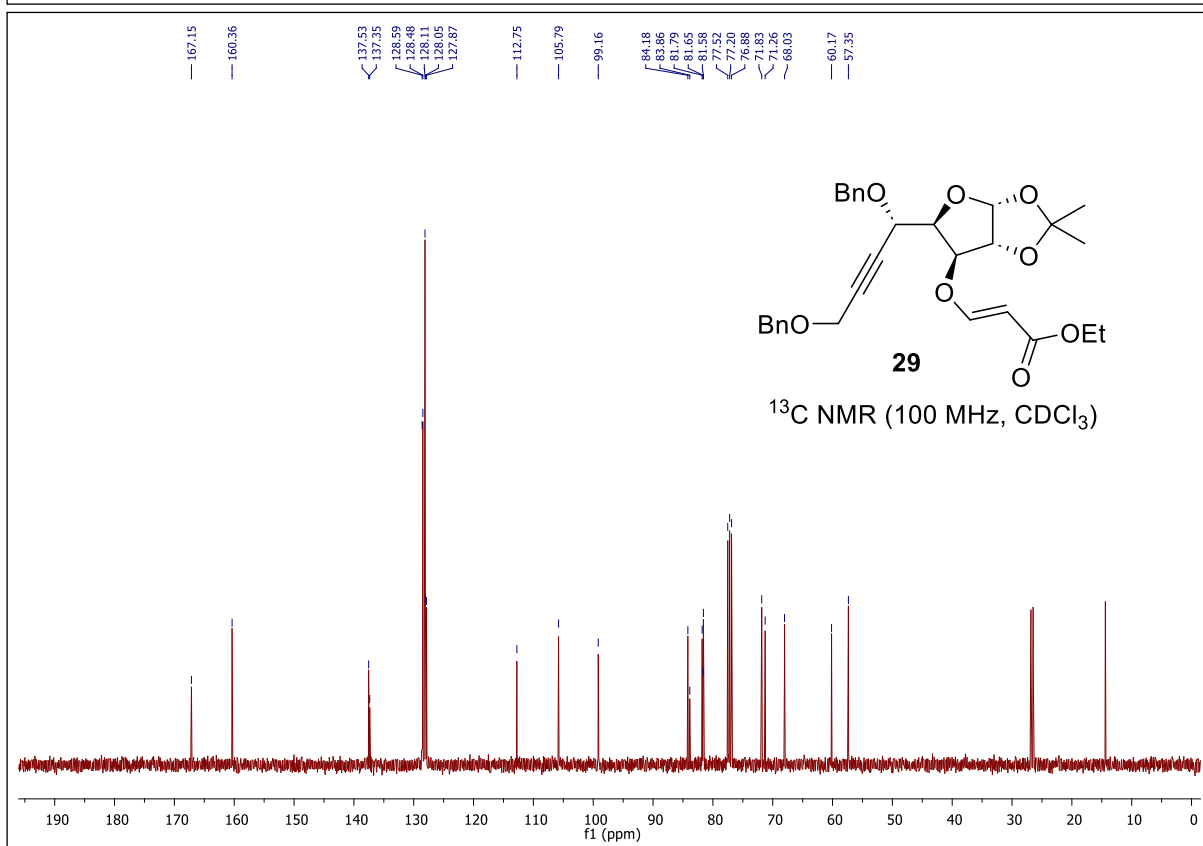

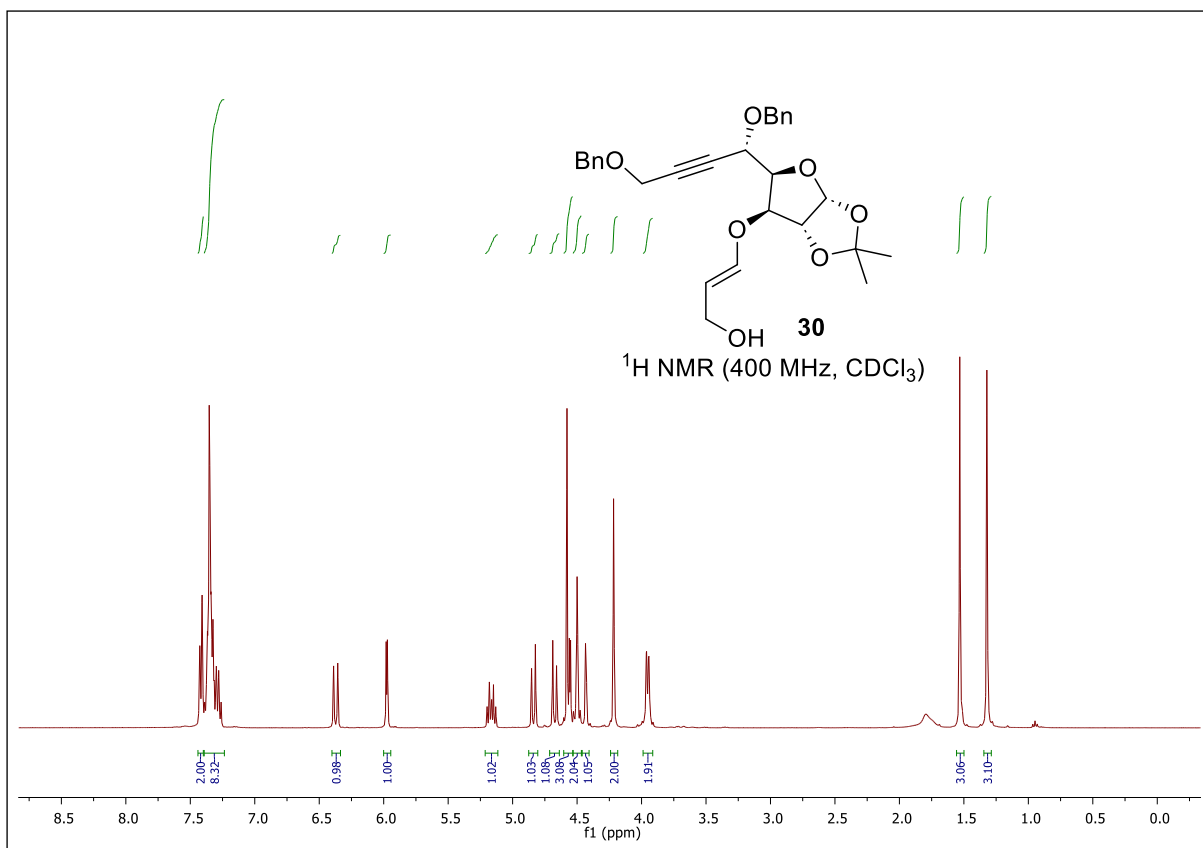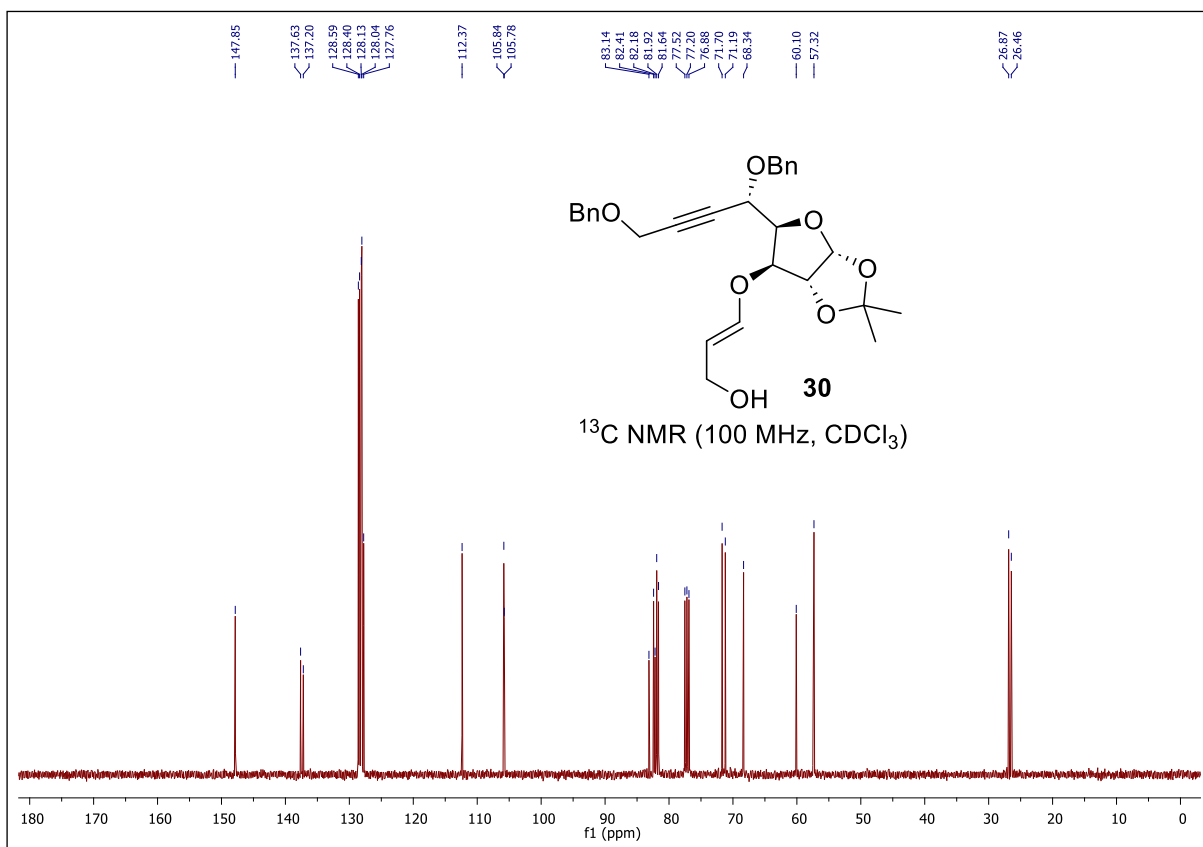

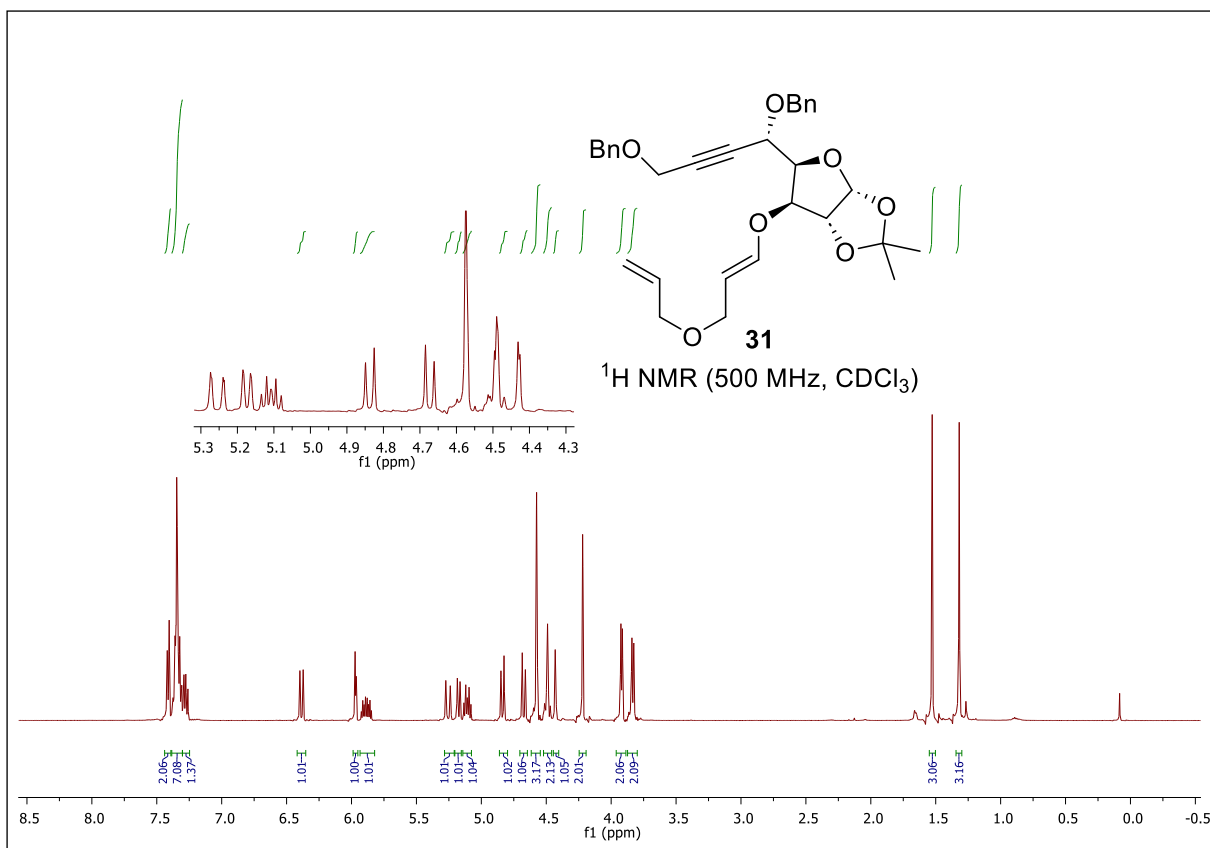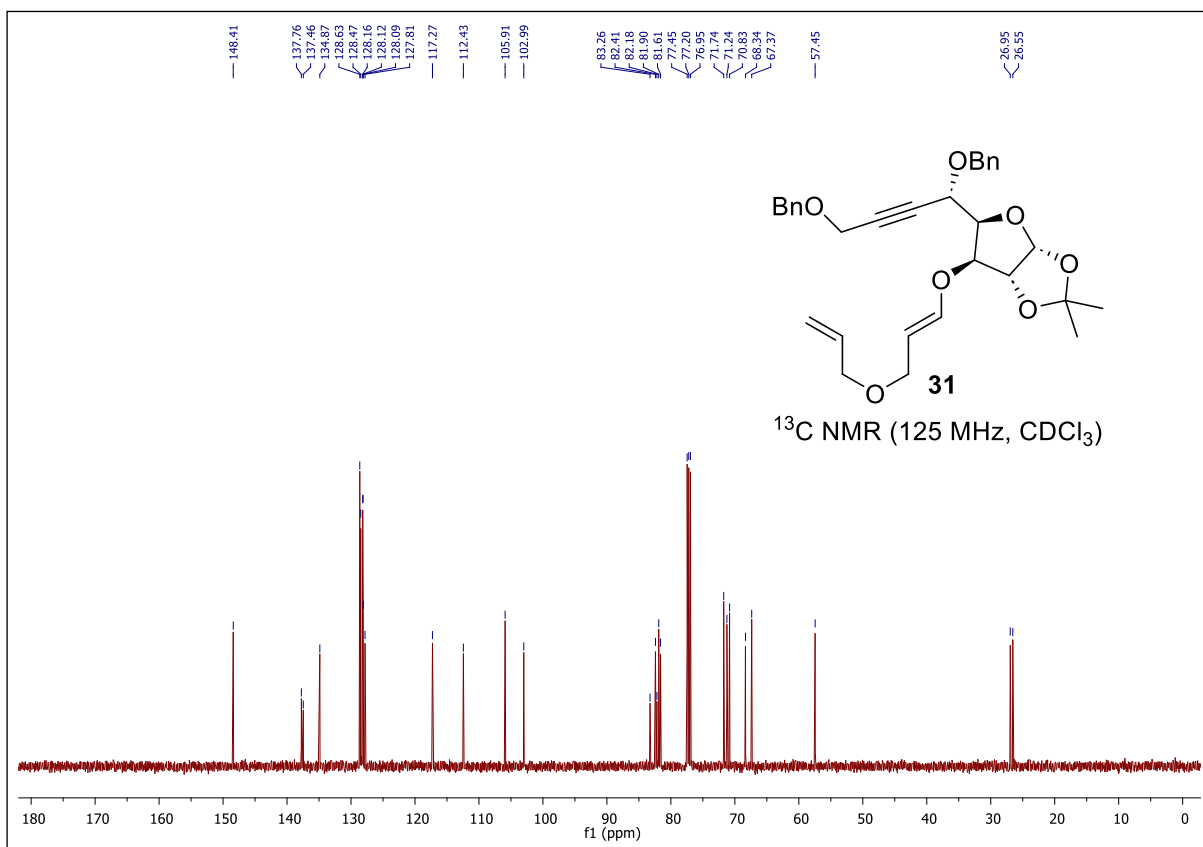

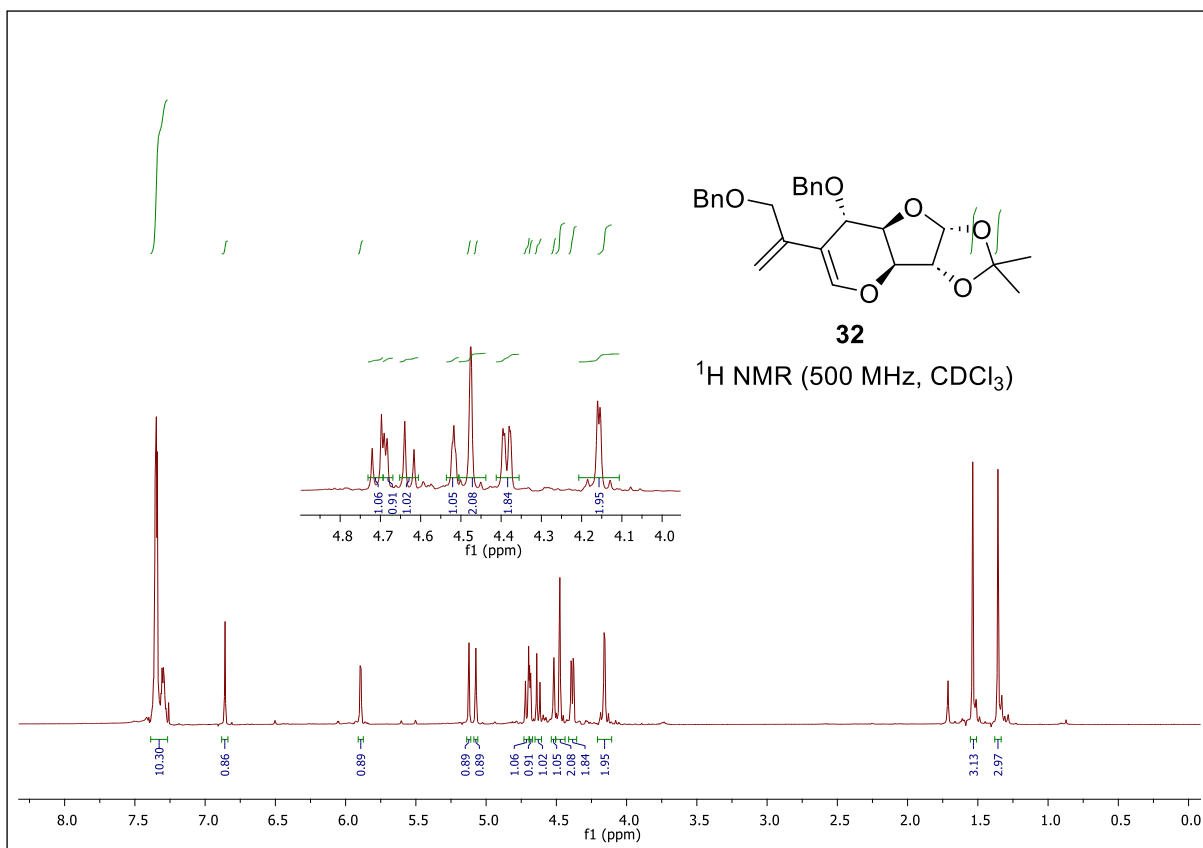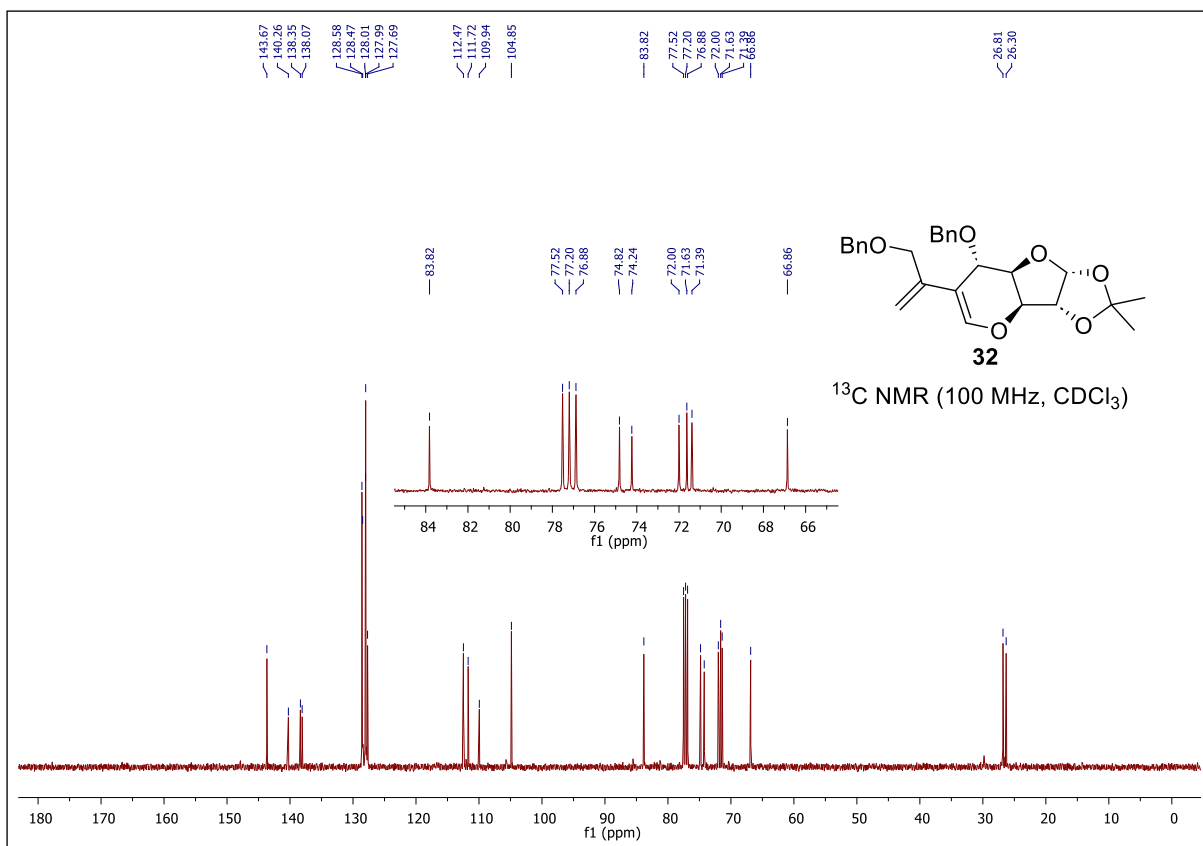



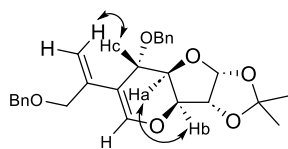

NOESY (500 MHz, CDCl<sub>3</sub>)

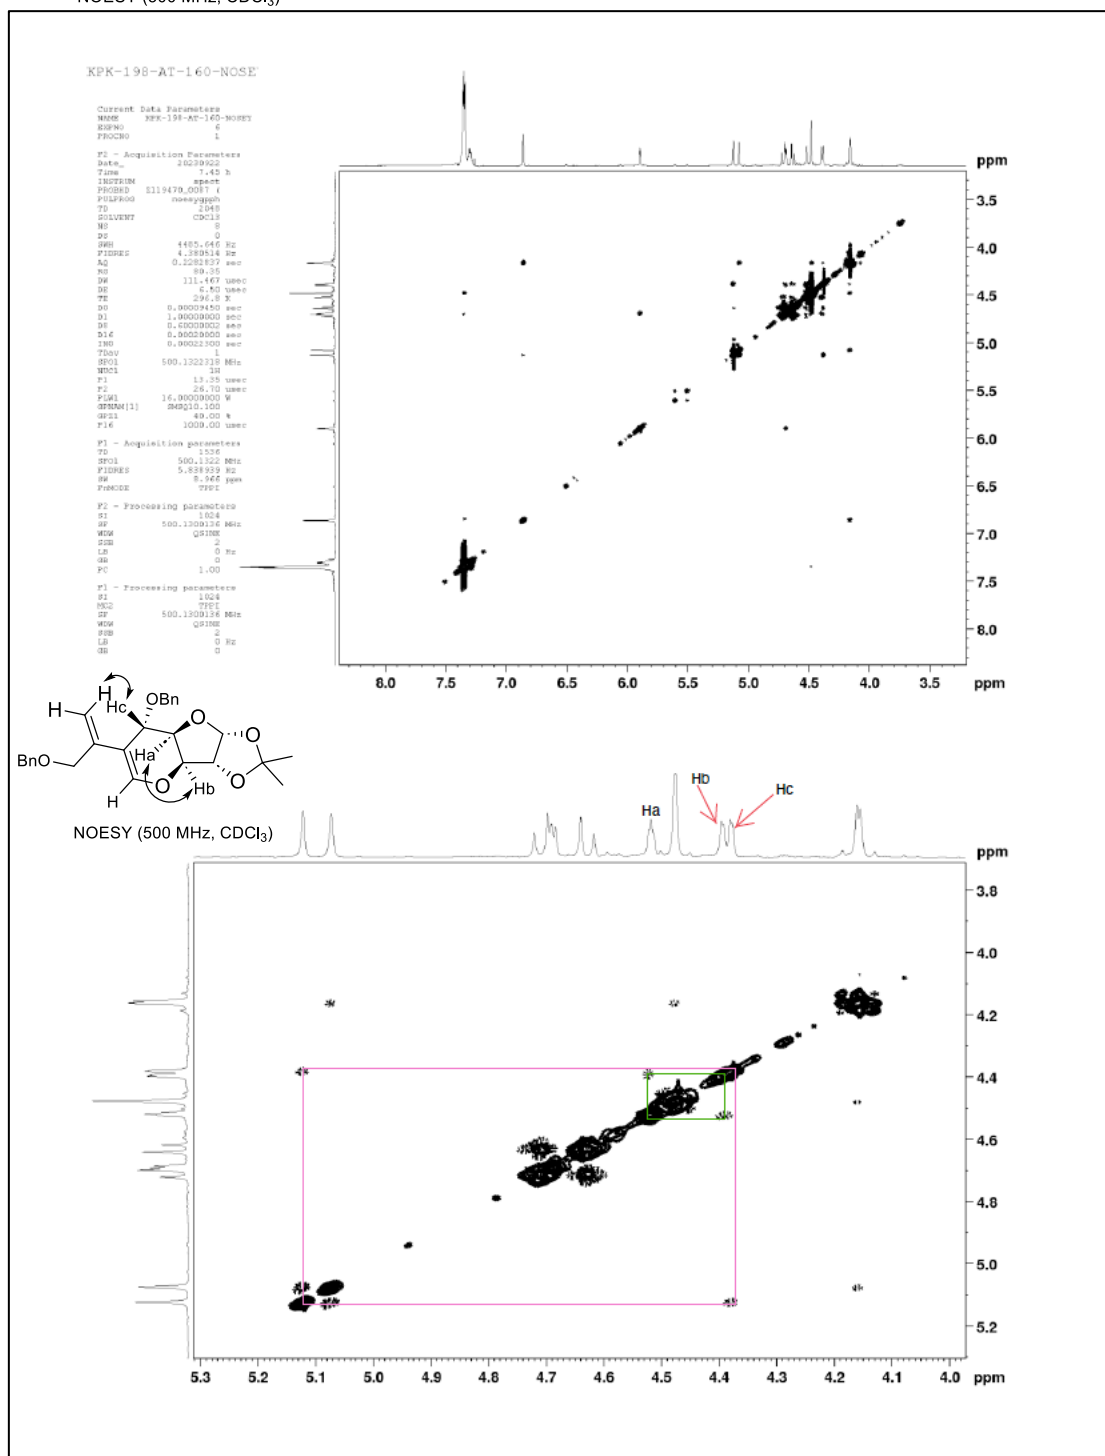

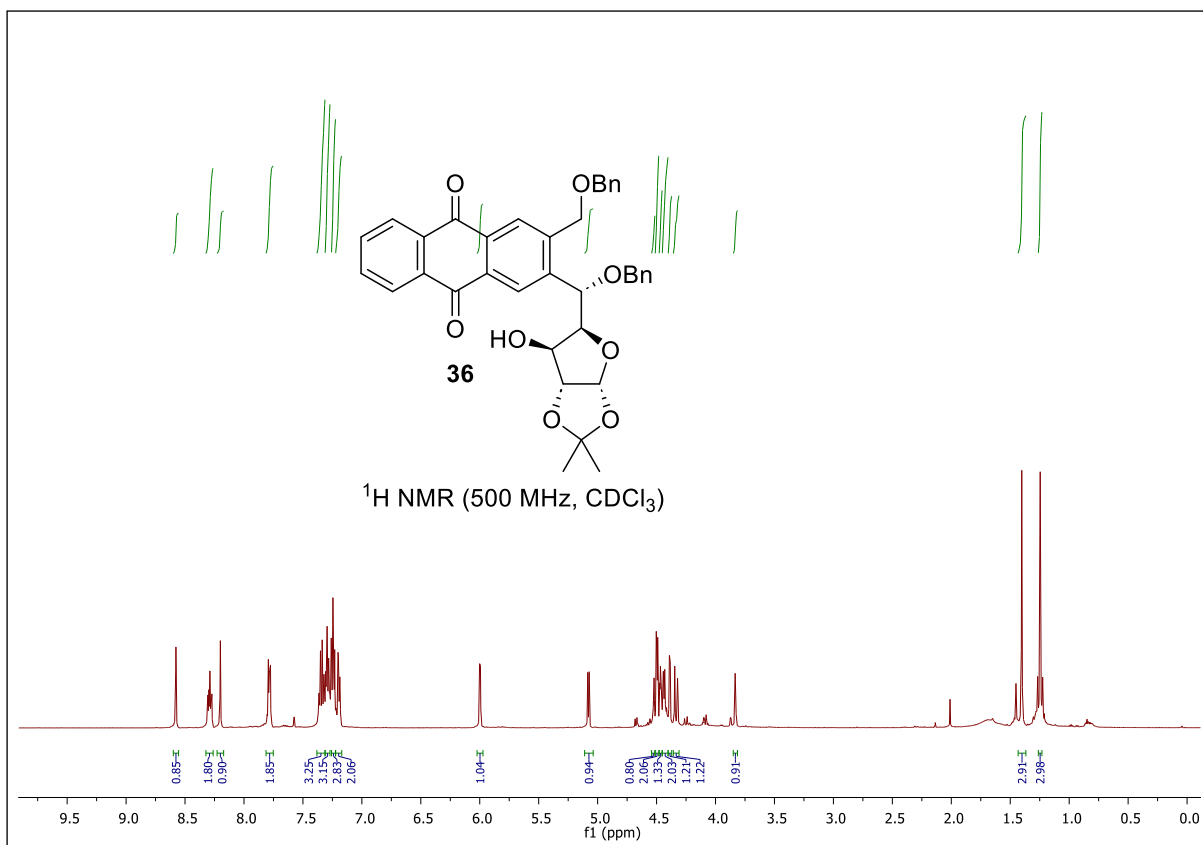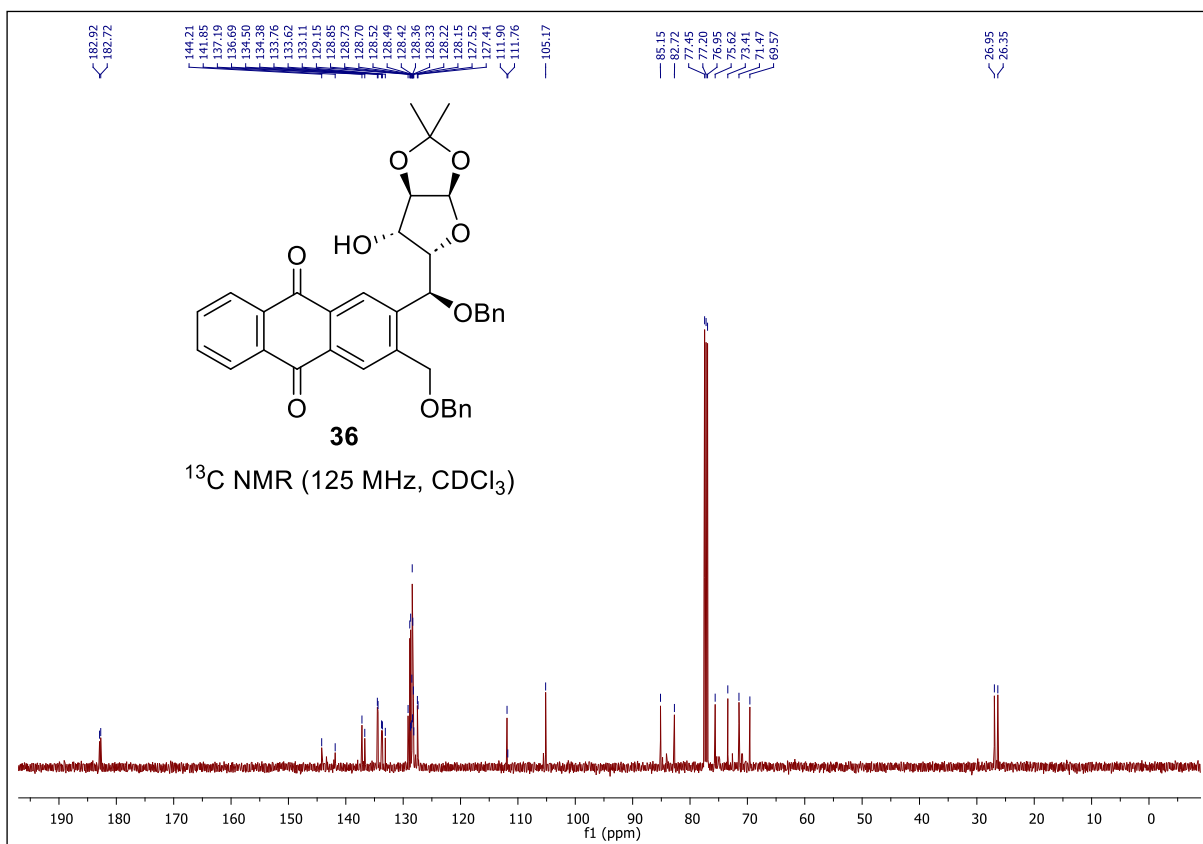



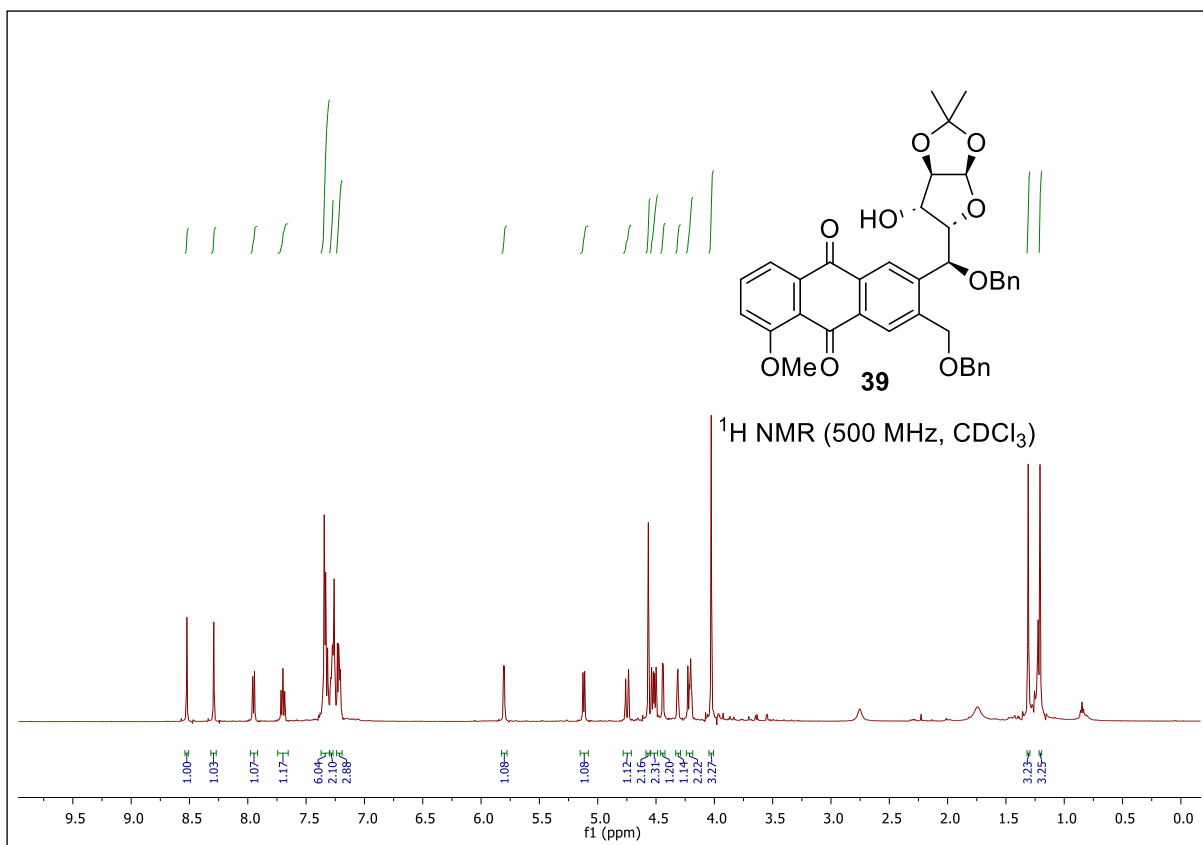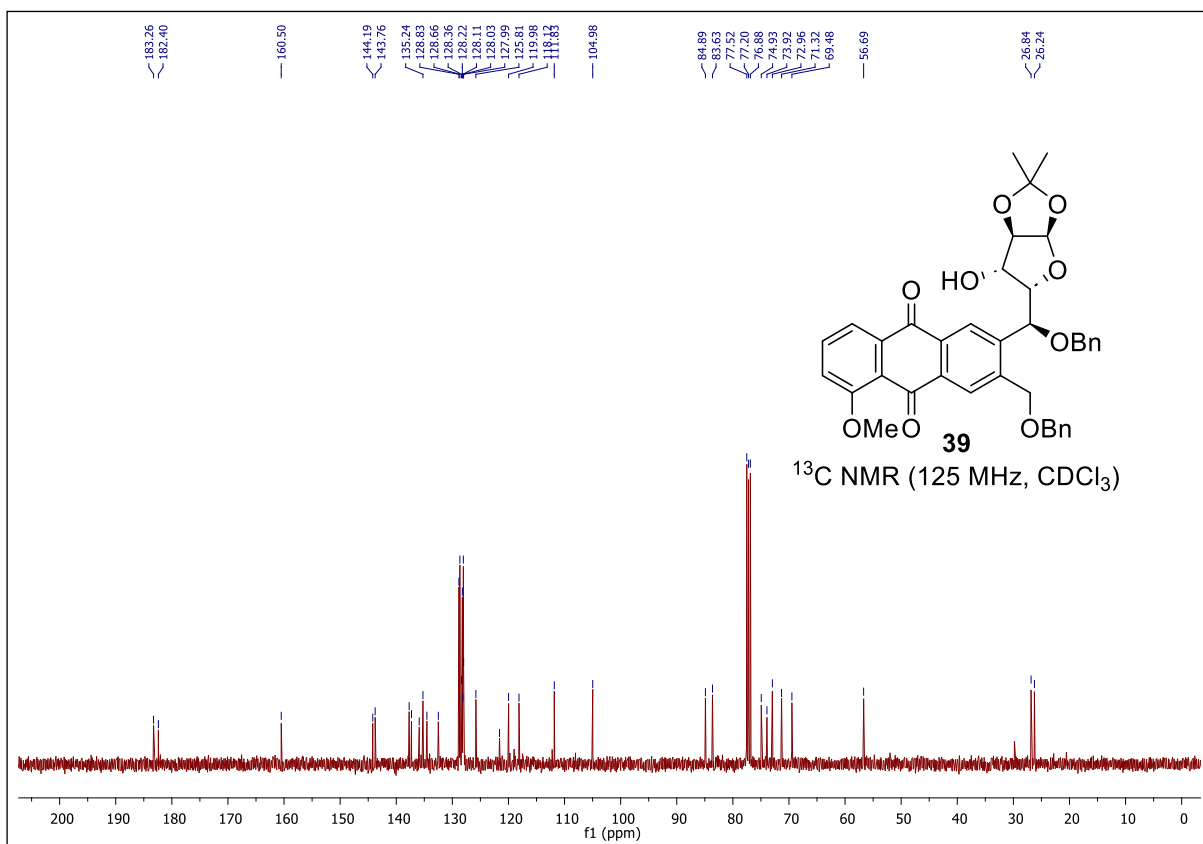

KPK-198-AT168-I-1H

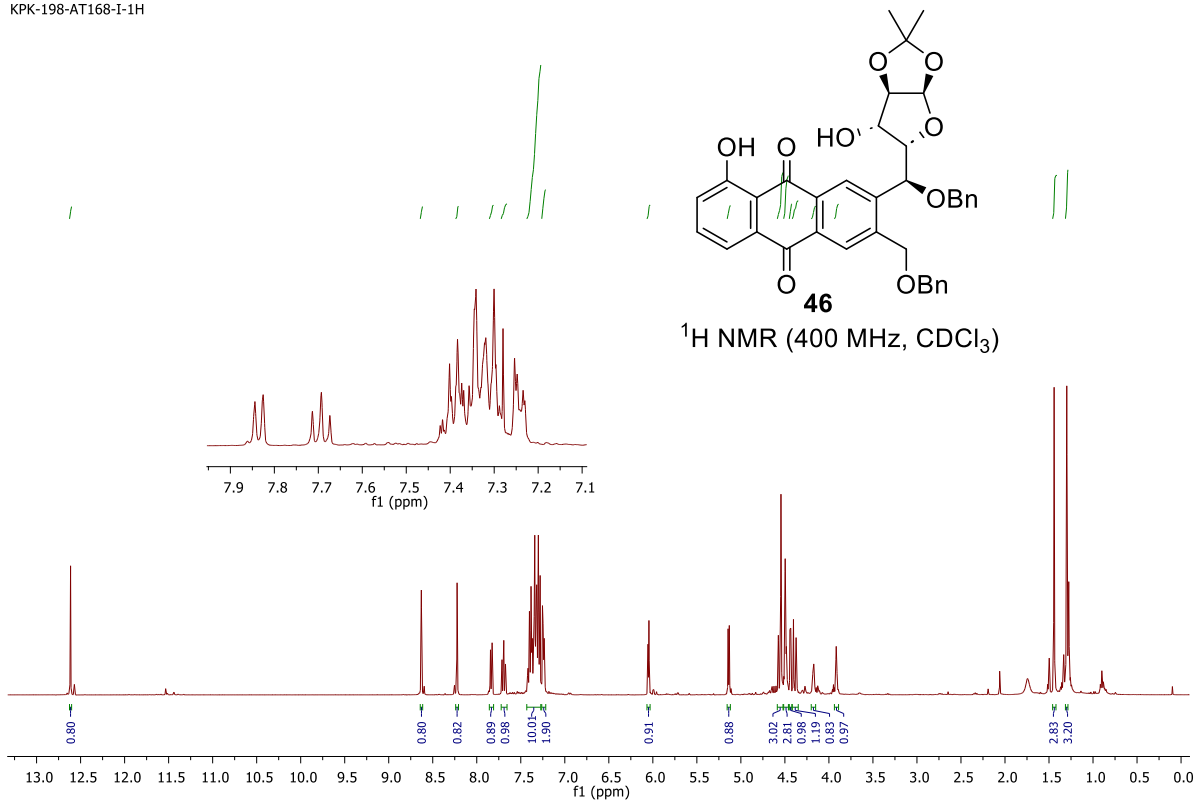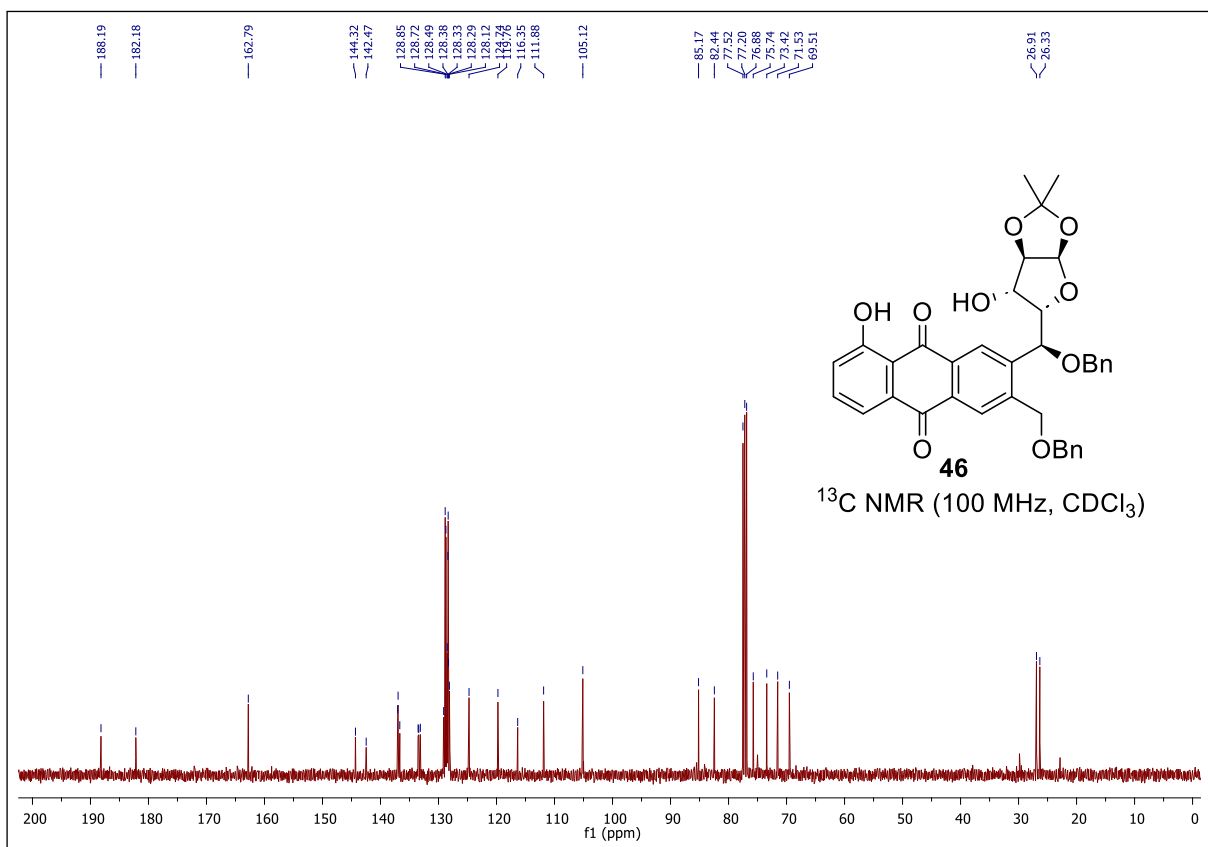

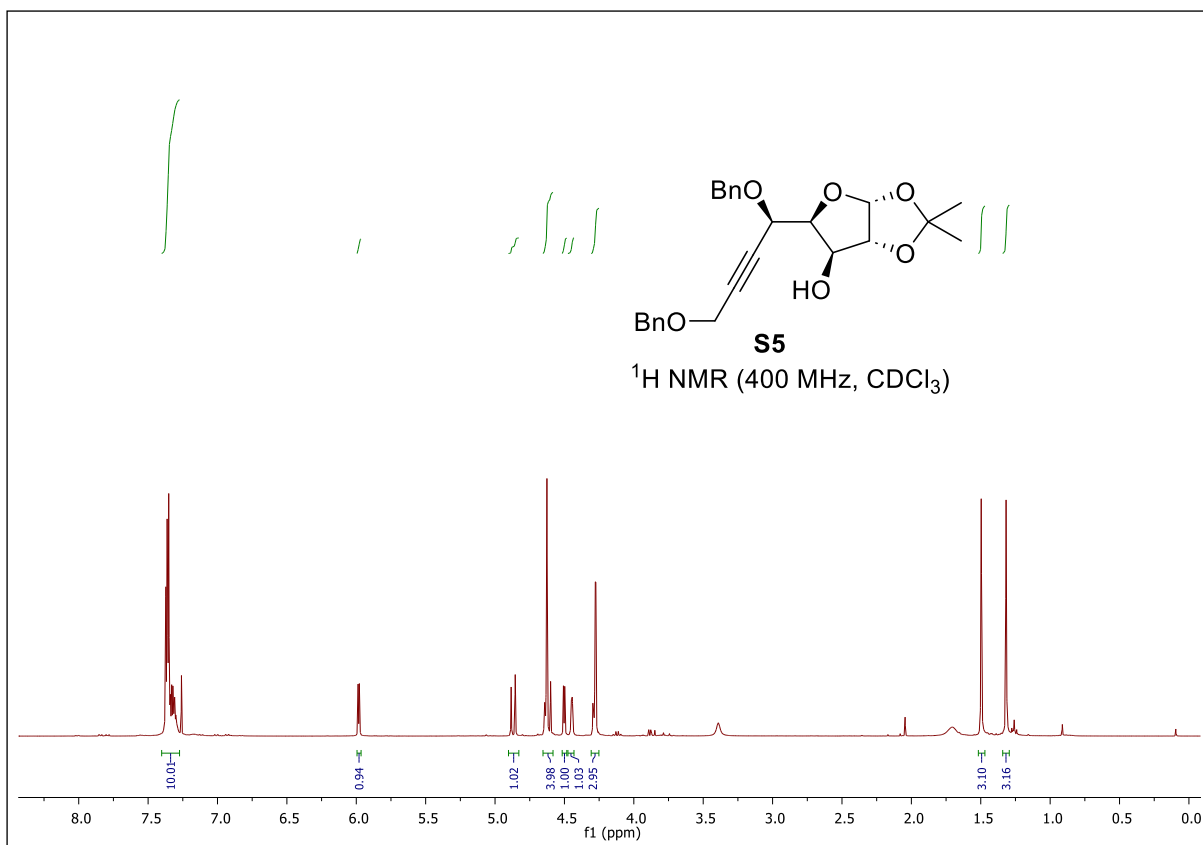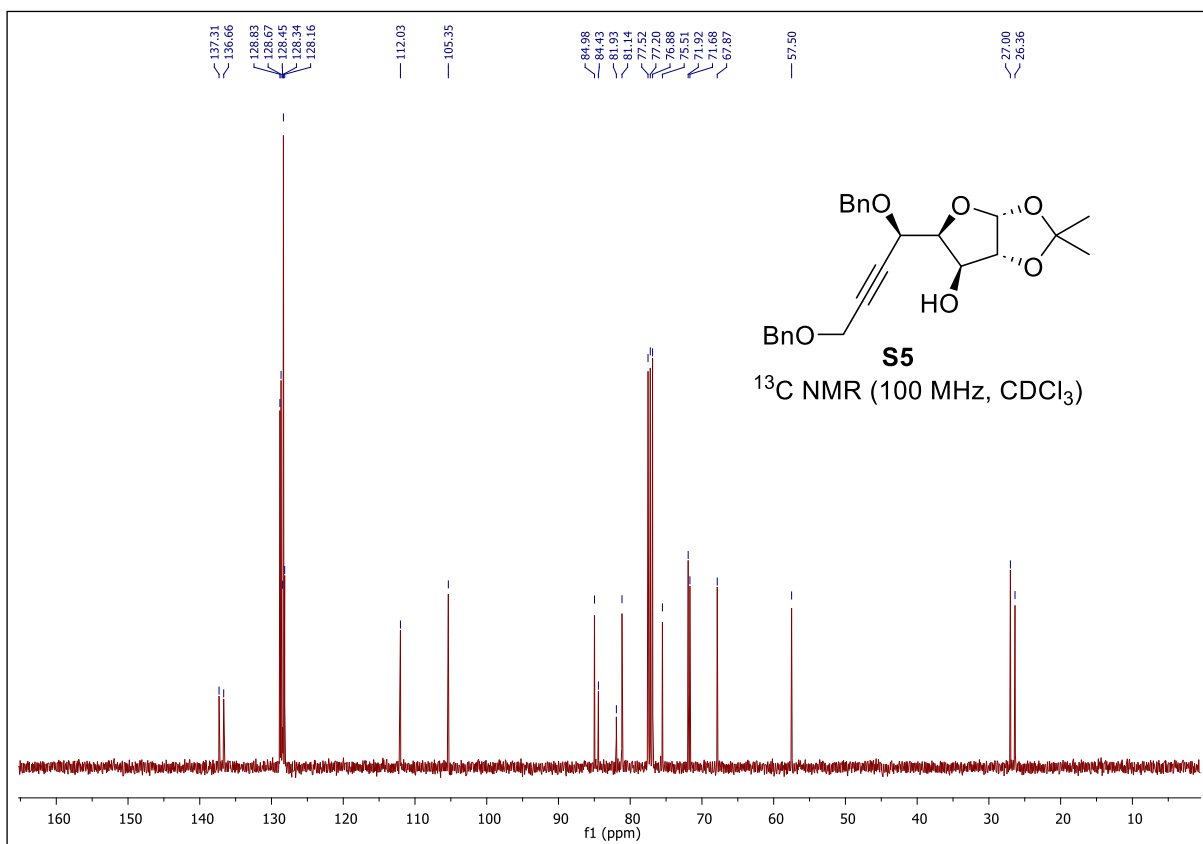

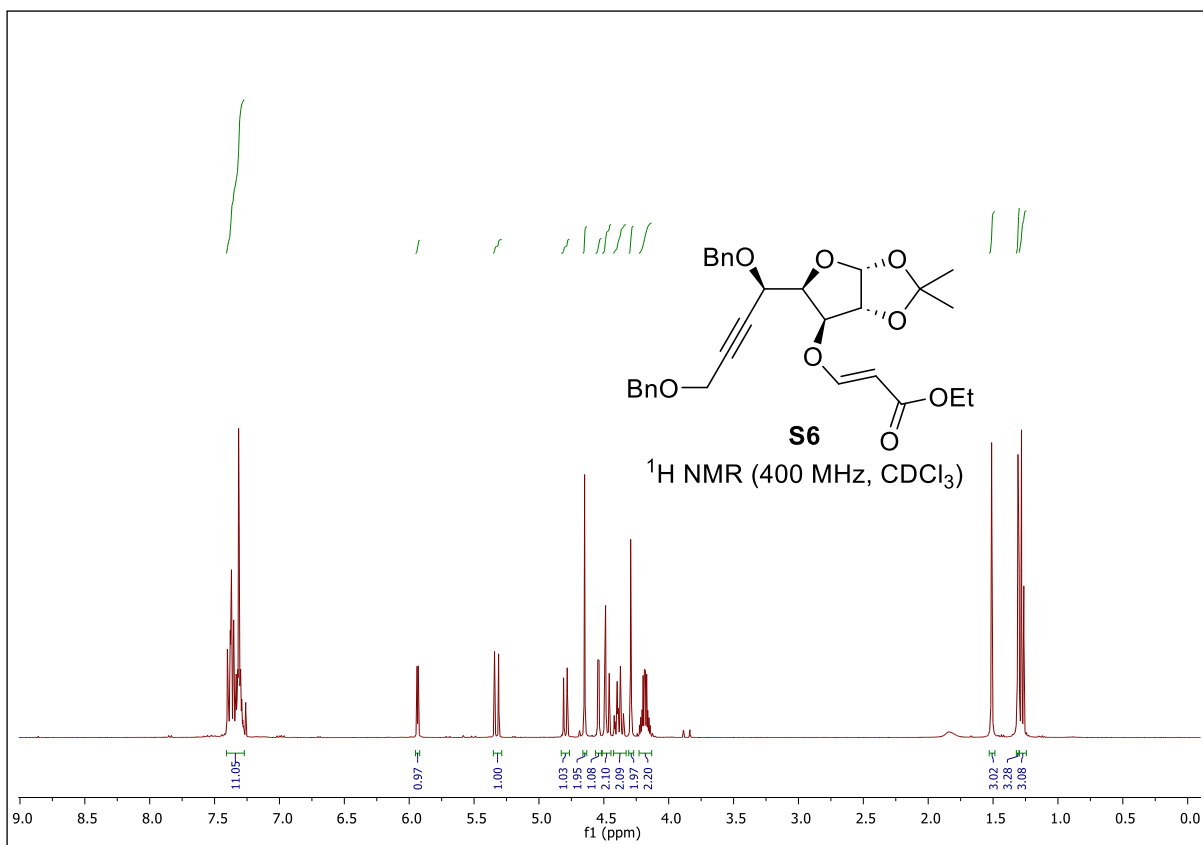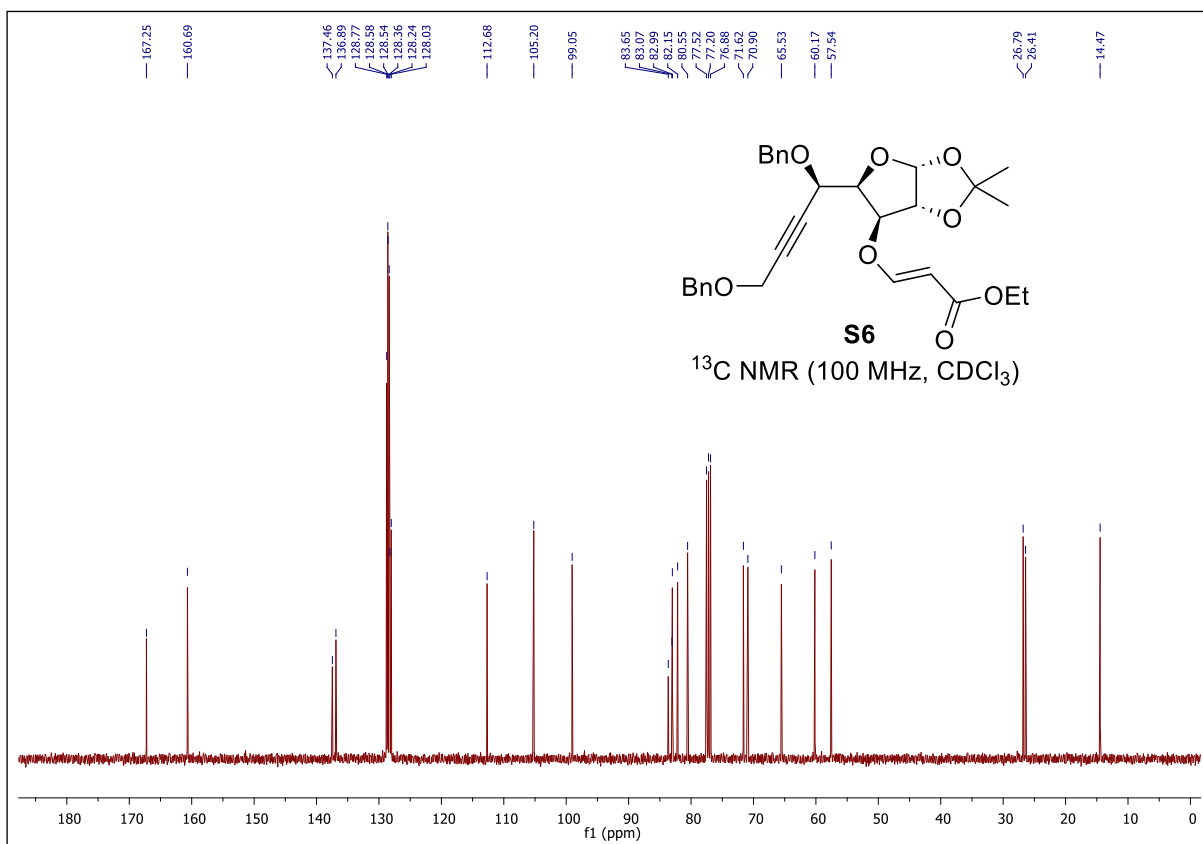

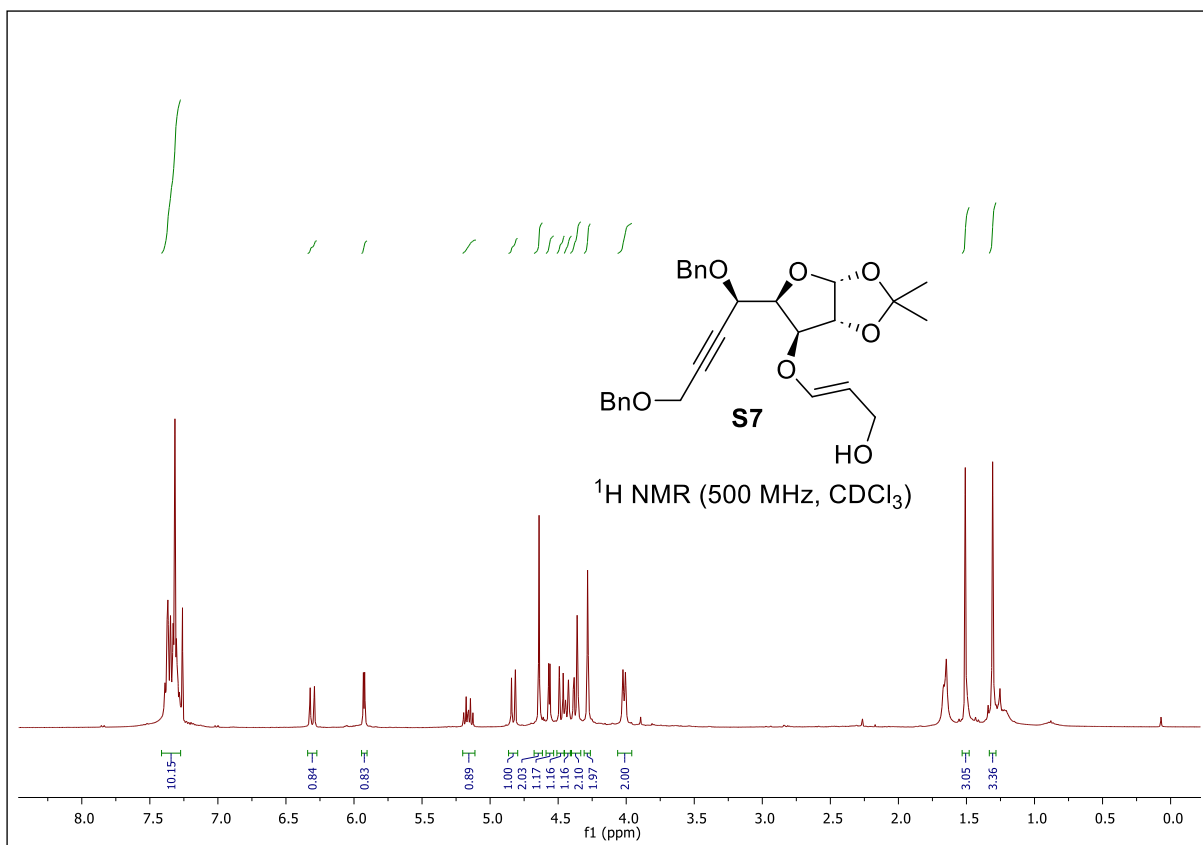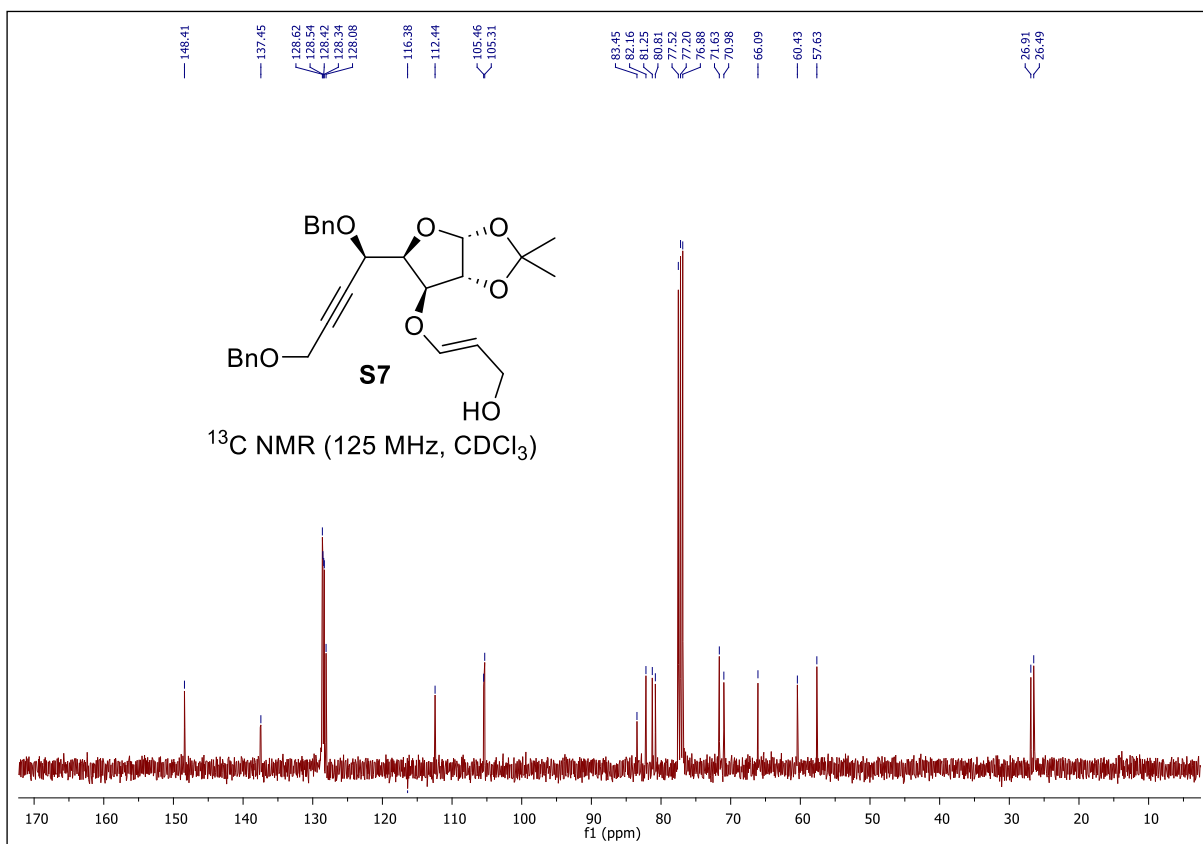

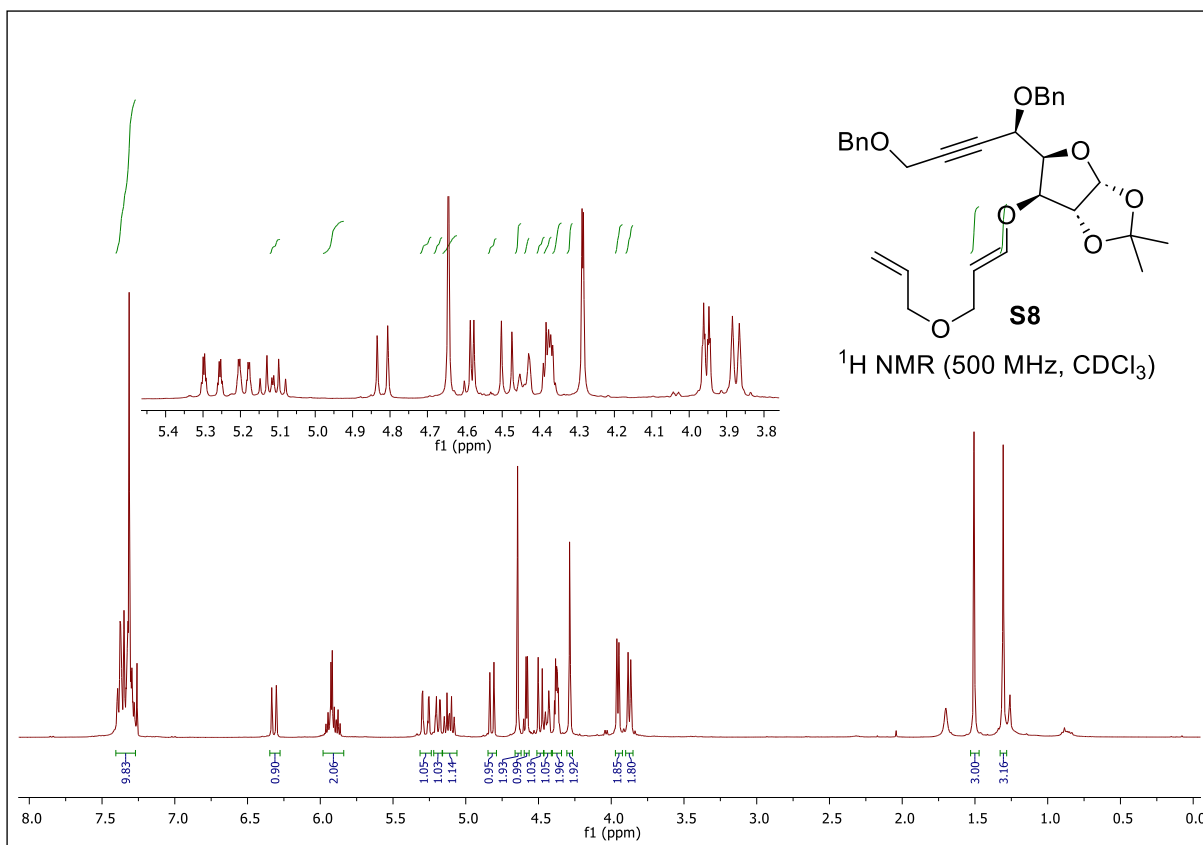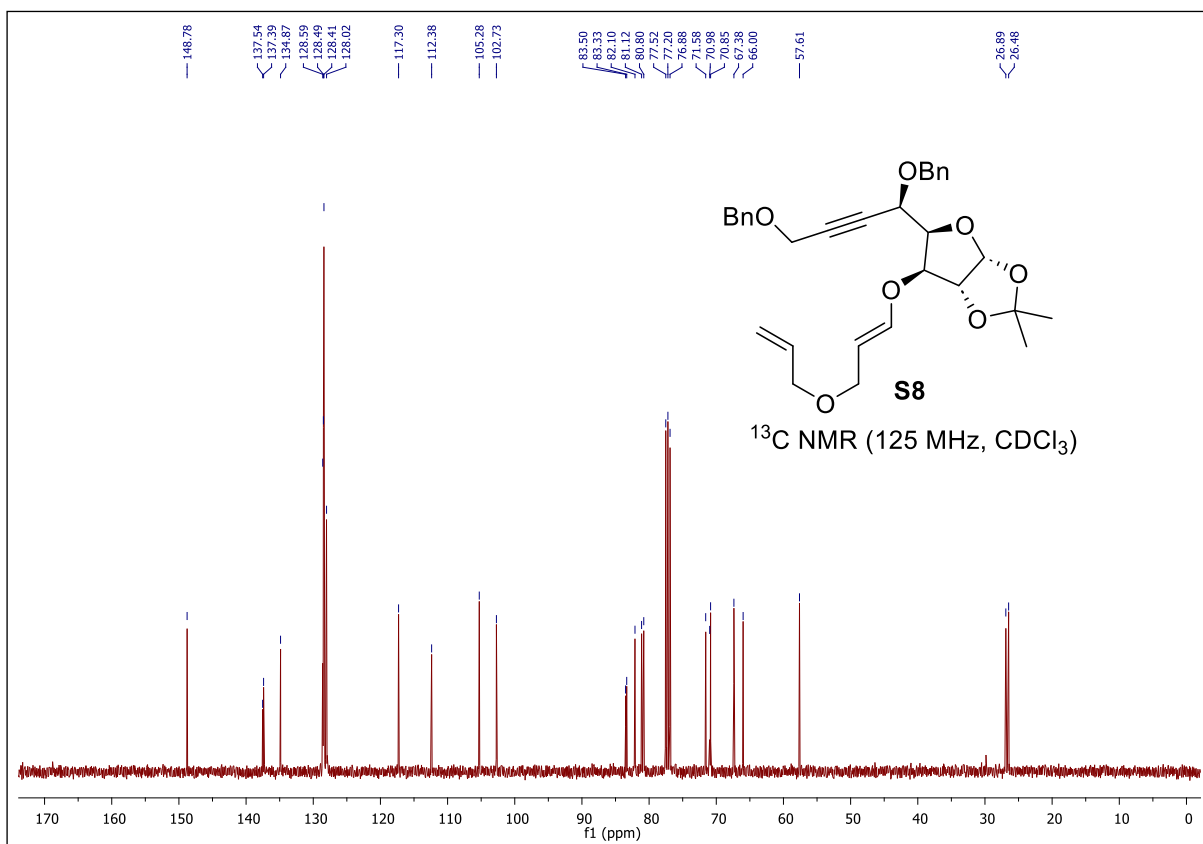

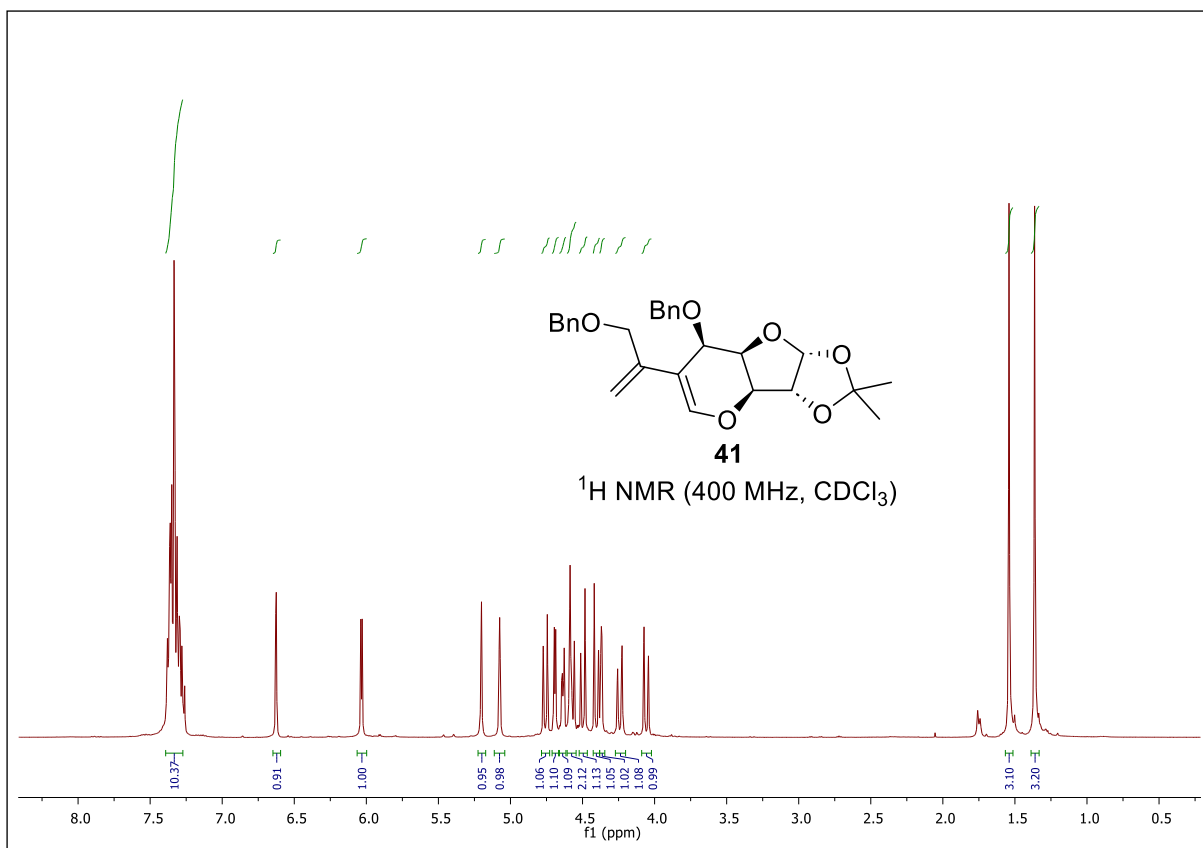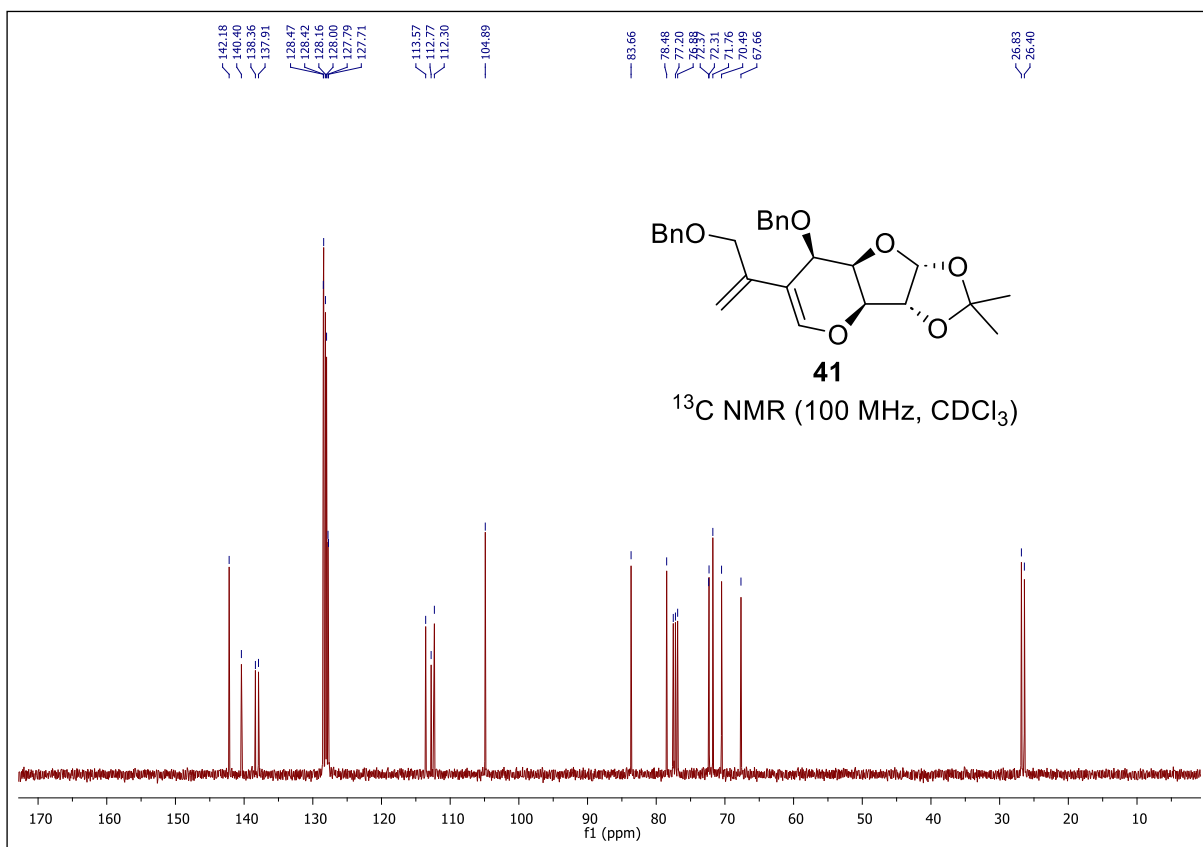

**1H-1H COSY NMR of Minor Diastereomer 41 (500 MHz, CDCl<sub>3</sub>)**

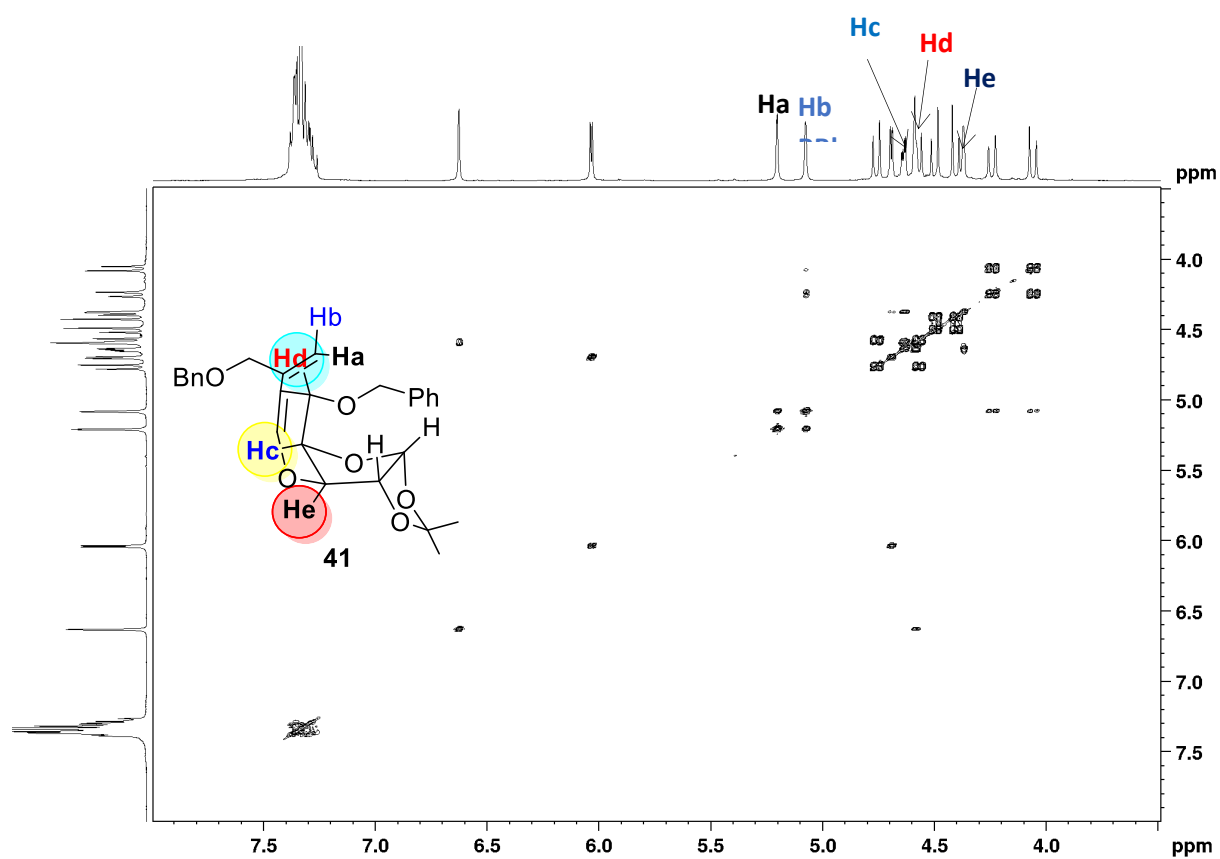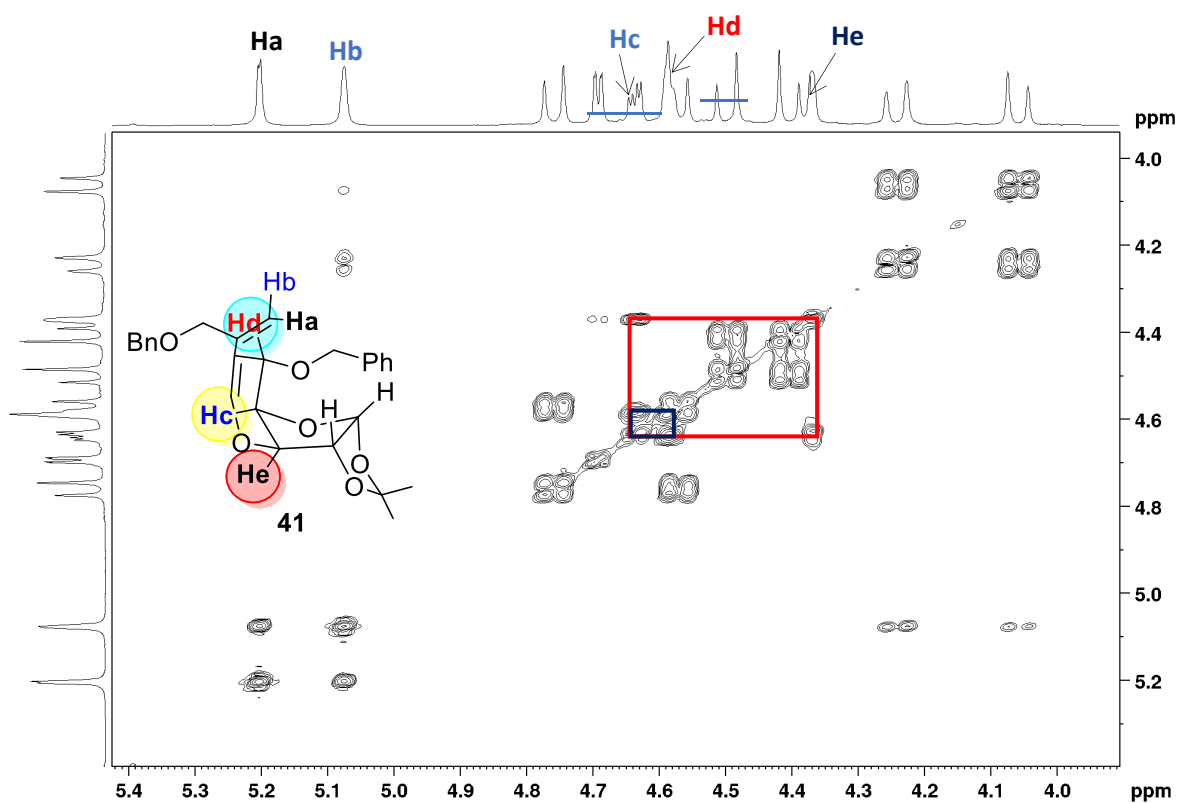



**1H-1H NOESY NMR of Minor Diastereomer 41 (500 MHz, CDCl<sub>3</sub>)**

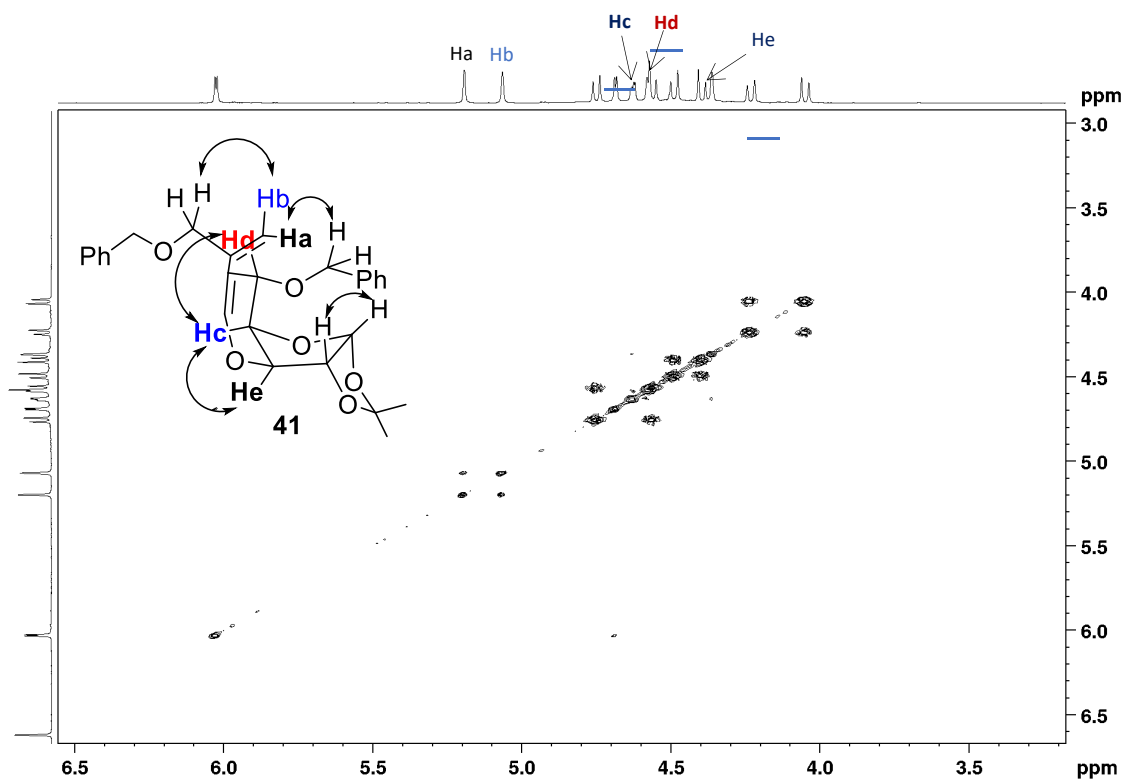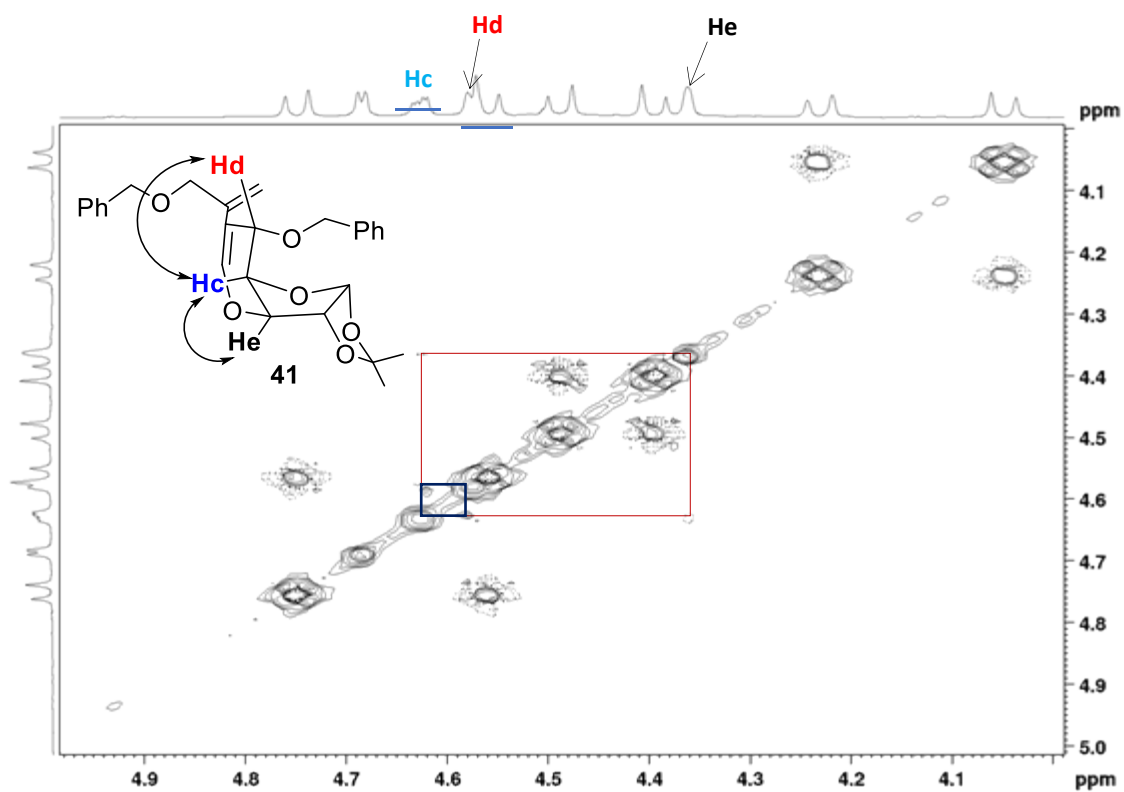

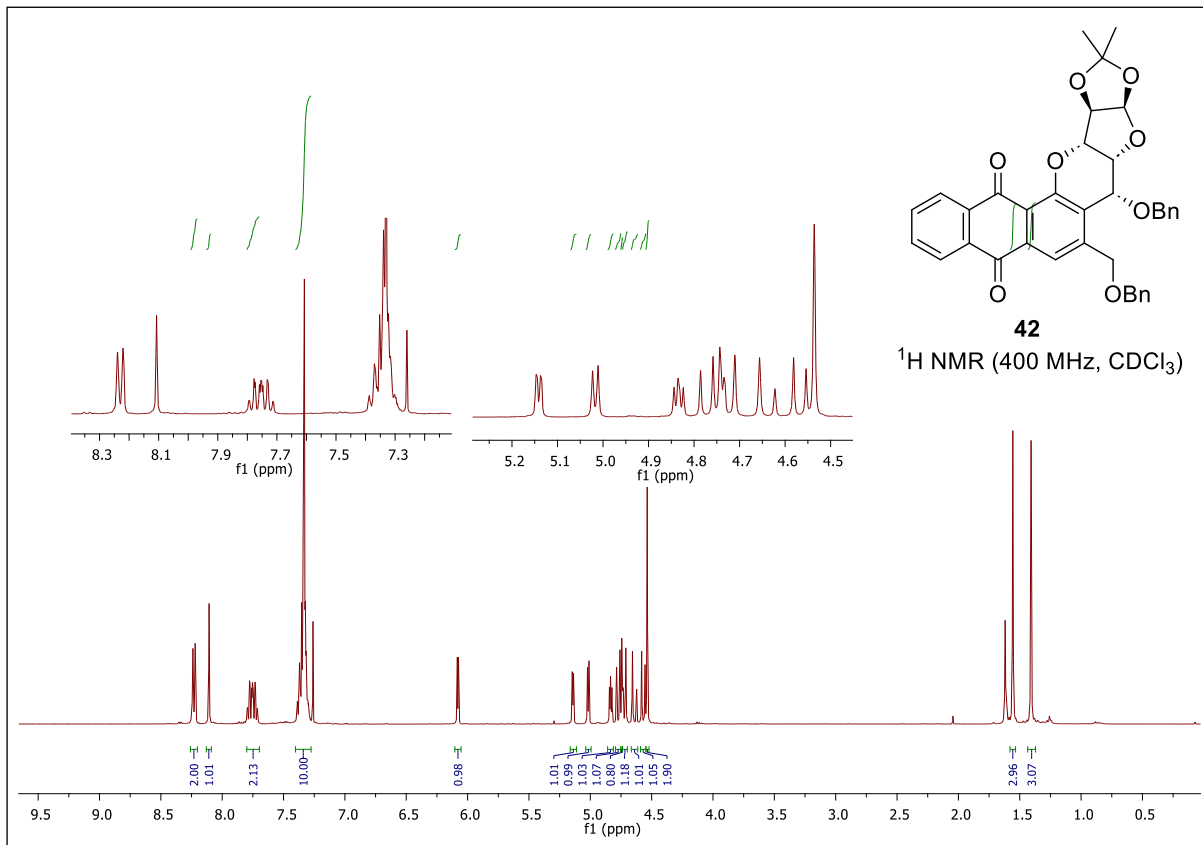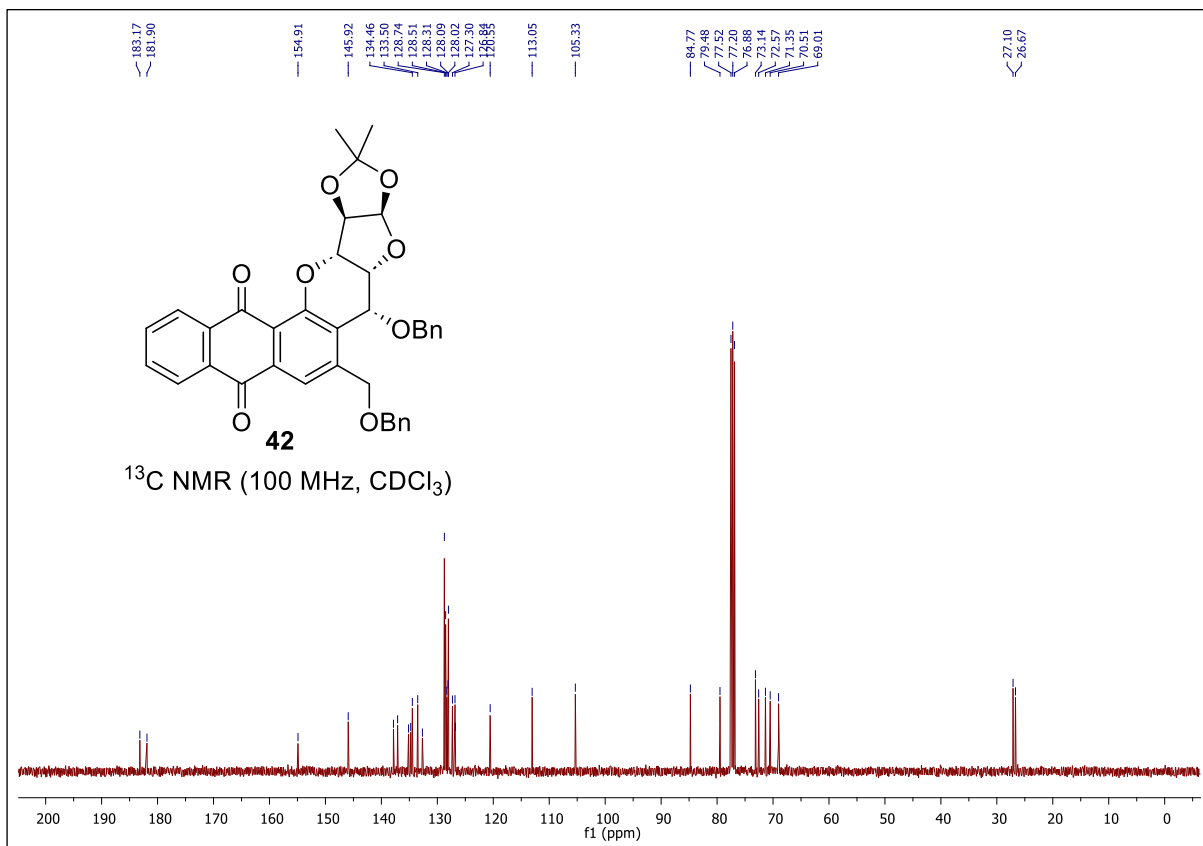

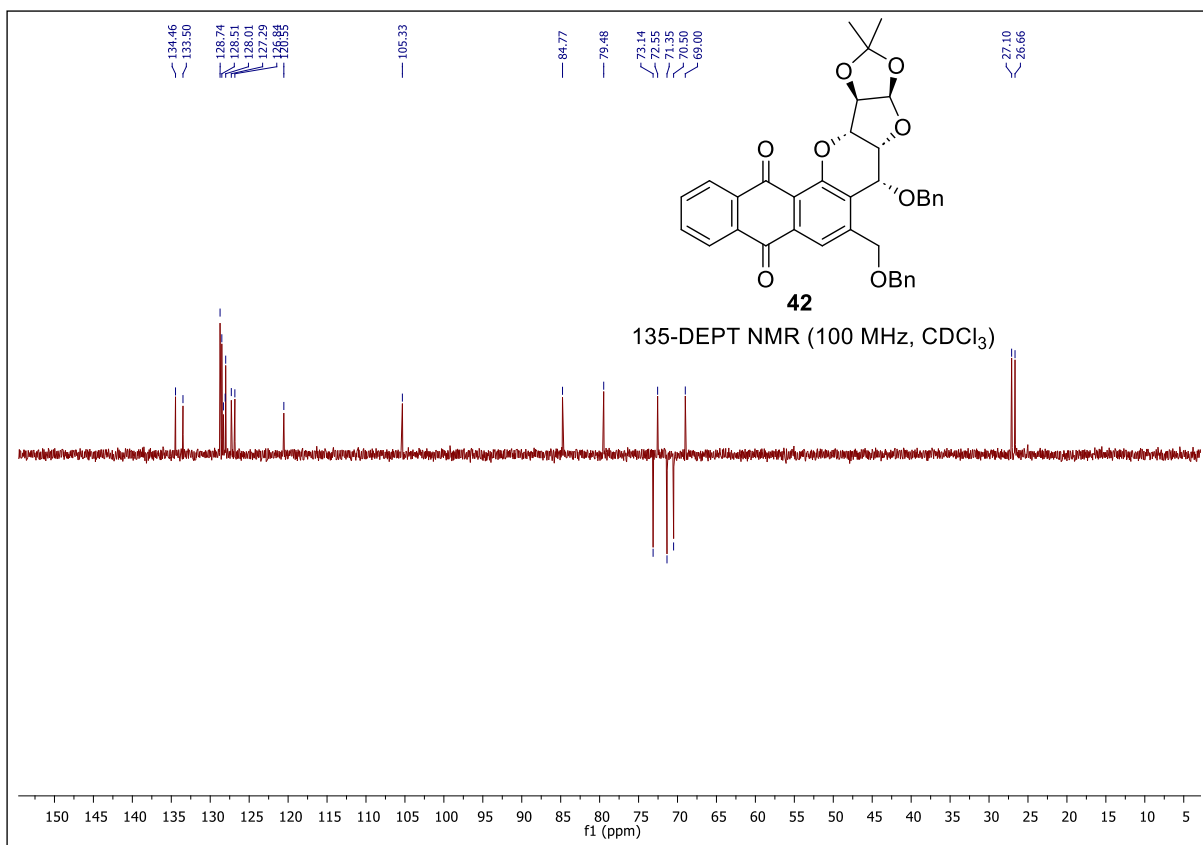

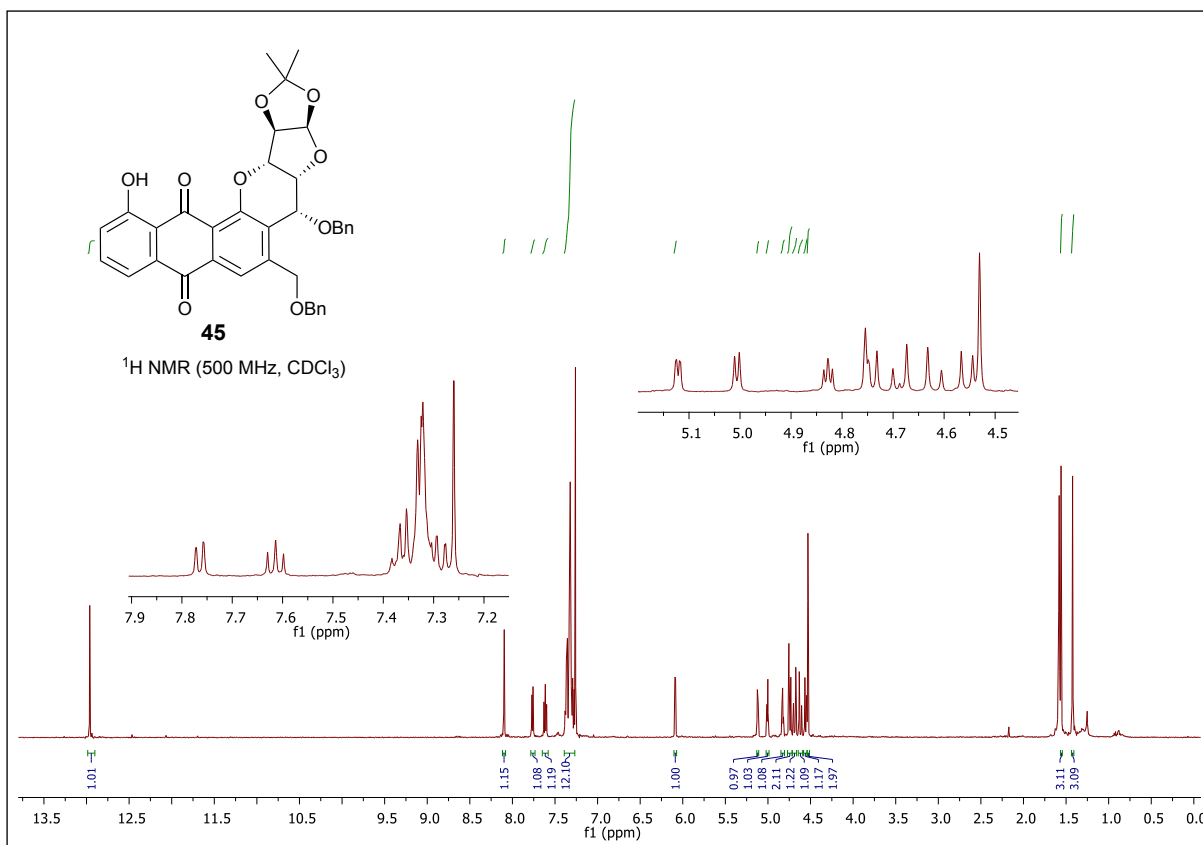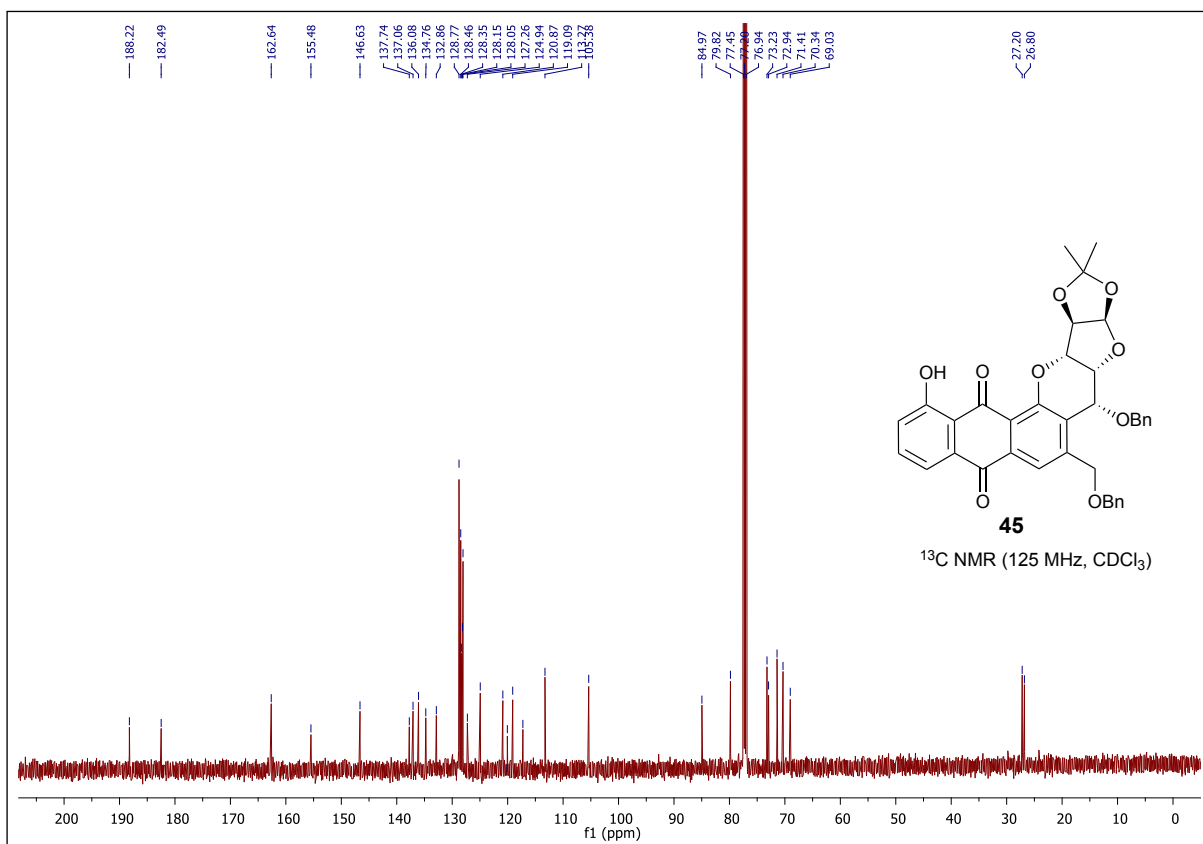

## HRMS Mass Data for the crude Reaction Mixture of intermediate 34

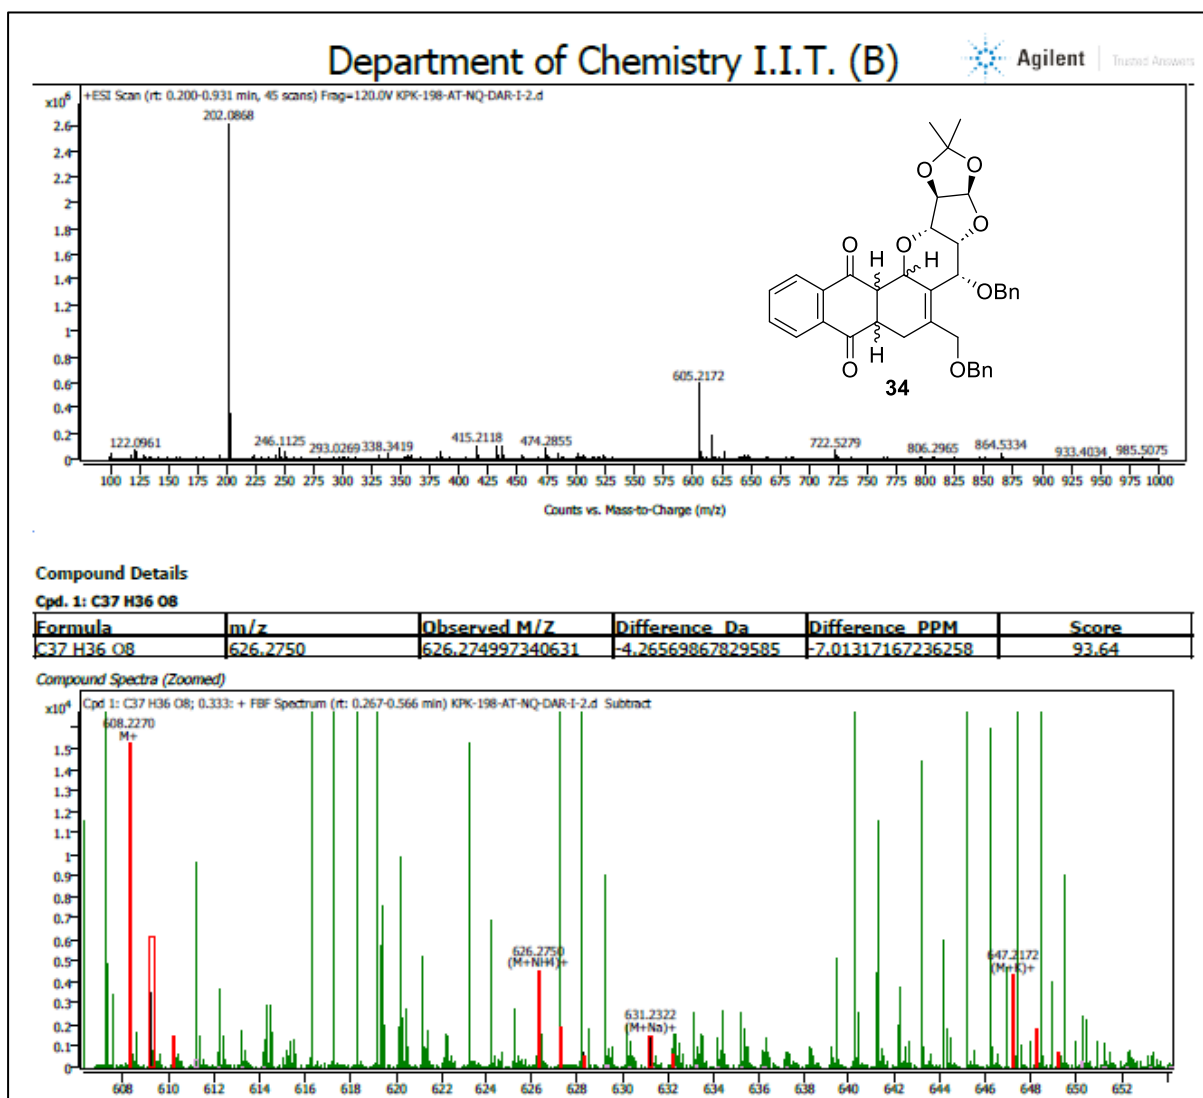

## HRMS Mass Data for the crude Reaction Mixture of intermediate 44

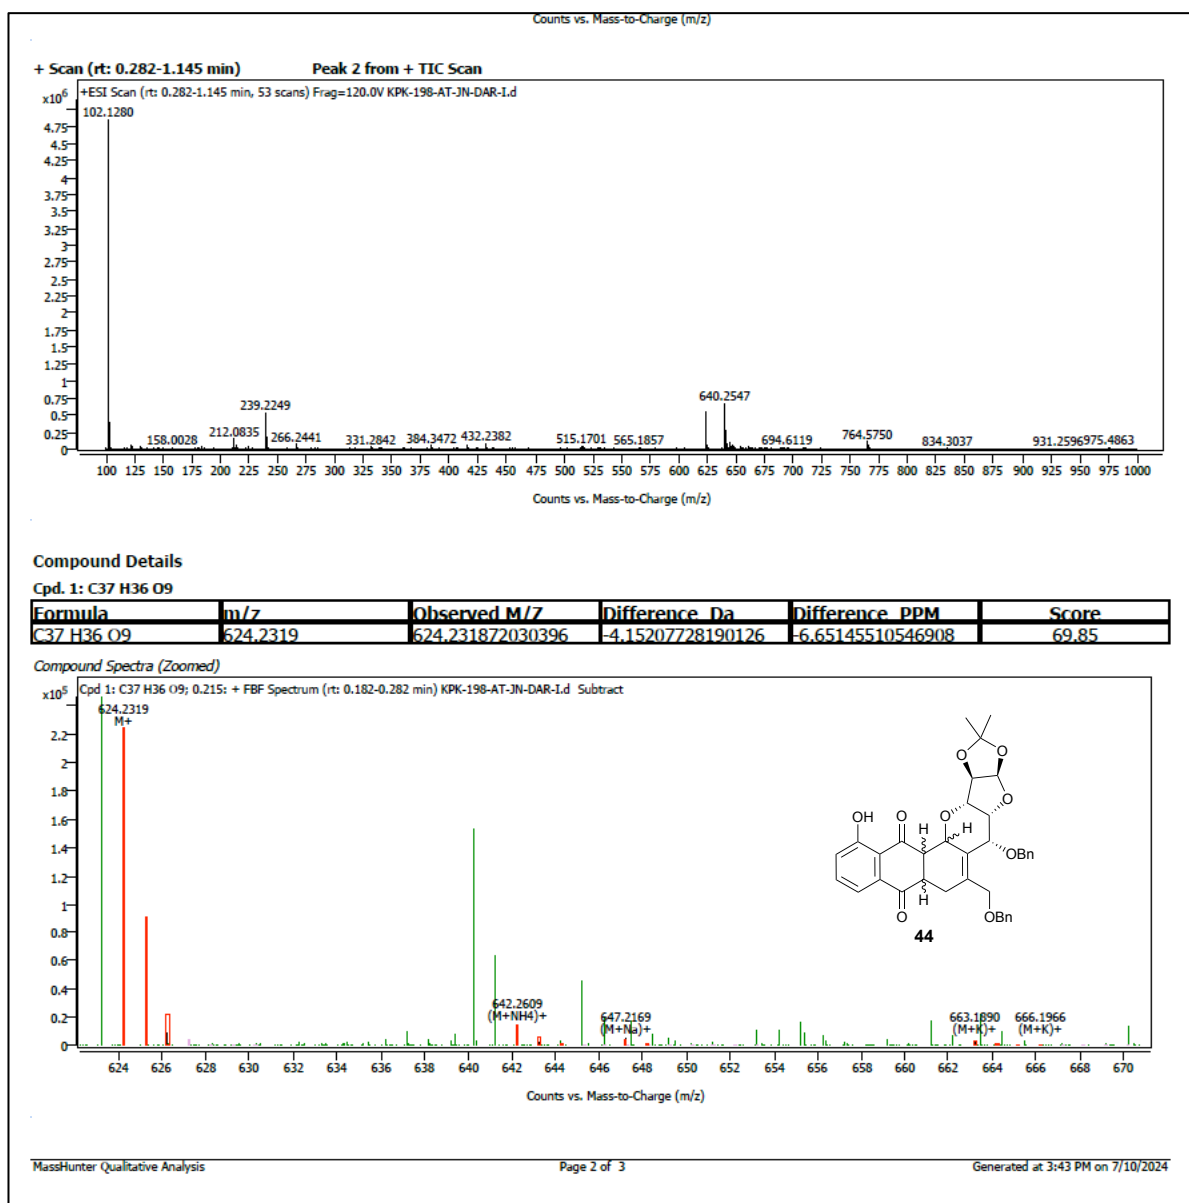

Supplement: d4ob01049c1.pdf [file d4ob01049c1.pdf]
